# 1 Pervasive differential splicing in Marek's 2 Disease Virus can discriminate CVI-988 3 vaccine strain from RB-1B virulent strain 4 in chicken embryonic fibroblasts

5  
6 Yashar Sadigh<sup>1\*</sup>, Abdessamad Tahiri-Alaoui<sup>2\*</sup>, Stephen Spatz<sup>3</sup>, Venugopal Nair<sup>1</sup>, Paolo  
7 Ribeca<sup>1†</sup>

8 <sup>1</sup>The Pirbright Institute, Ash Road, Woking, GU24 0NF, United Kingdom

9 <sup>2</sup>Clinical BioManufacturing Facility, Jenner Institute, University of Oxford, Old Road, Headington,  
10 Oxford OX3 7JT, United Kingdom

11 <sup>3</sup>US National Poultry Research Center, 934 College Station Road, Athens, GA 30605, United States

12 \* Joint first authors

13 † Corresponding author: [paolo.ribeca@pirbright.ac.uk](mailto:paolo.ribeca@pirbright.ac.uk)

## 14 Abstract

15 Marek's disease is a major scourge challenging poultry health worldwide. It is caused by the highly  
16 contagious Marek's disease virus (MDV), an alphaherpesvirus. Here we show that, similar to other  
17 members of its *Herpesviridae* family, MDV also presents a complex landscape of splicing events,  
18 most of which are uncharacterised and/or not annotated. Quite strikingly, and although the  
19 biological relevance of this fact is unknown, we found that a number of viral splicing isoforms are  
20 strain-specific despite the close sequence similarity of the strains considered, virulent RB-1B and  
21 vaccine CVI-988. We validated our findings by devising an assay that discriminates infections caused  
22 by the two strains in chicken embryonic fibroblasts based on the presence of some RNA species. To  
23 our knowledge, this study is the first ever to accomplish such a result, emphasizing how important a  
24 comprehensive knowledge of the viral transcriptome can be to understand viral pathogenesis.

## 25 Importance

26 Marek's disease virus (MDV) causes an agro-economically important disease of chickens worldwide.  
27 Although commercial poultry are vaccinated against MDV, it is not possible to achieve sterilising  
28 immunity, and available vaccines can only protect chickens against the symptoms of the disease.  
29 Vaccinated chicken often become superinfected with virulent strains, shedding virus into the  
30 environment. The most effective MDV vaccine strain, CVI-988, shares >99% sequence identity with  
31 the prototype virulent virus strain RB-1B. Interestingly, our work shows that despite their almost  
32 identical sequences MDV strains CVI-988 and RB-1B have significantly different splicing profiles, and  
33 hence transcriptomes. We independently validated this discovery by detecting with real-time PCR  
34 some splicing isoforms expressed by MDV strain CVI-988 and absent in the transcriptome of the RB-  
35 1B strain. These results indicate that the coding potential of MDV might be much larger than

36 previously thought, and suggest a likely underestimation of the role of the viral transcriptome in the  
37 pathogenesis and prevention of MDV.

## 38 Introduction

39 Marek's disease (MD) is a major scourge of poultry, caused by Marek's disease virus (MDV, also  
40 known as *Gallid herpesvirus 2*, GaHV 2), a member of genus *Mardivirus* in the subfamily  
41 *Alphaherpesvirinae* of the family *Herpesviridae*. MD is characterised by paralysis,  
42 immunosuppression, and lymphoid infiltration into different tissues, including the peripheral nerves,  
43 eye, muscle and skin. Lymphoid tumours in the visceral organs can be observed as early as 3 weeks  
44 post inoculation. Control of MD has been achieved by vaccination with the live attenuated oncogenic  
45 *Gallid herpesvirus 2* (MDV-1) strain CVI-988 (also known as Rispens) and the non-oncogenic  
46 antigenically related vaccine viruses *Gallid herpesvirus 3* (MDV-2) strain SB-1, and *Meleagrid*  
47 *herpesvirus 1* (herpesvirus of turkey, HVT) strain Fc126 (1-3). These vaccines were introduced at  
48 different periods to control the disease caused by various MDV pathotypes. Today they are used  
49 individually or more frequently in combination, since formulations including more than one vaccine  
50 can have a synergistic effect that induces stronger protection against MD (4). However, despite  
51 effectiveness of the single best vaccine (i.e. MDV strain CVI-988) in producing lifelong immunity  
52 against clinical disease and mortality, all fail to produce sterilising immunity against MDV infection.  
53 Vaccinated chickens can become infected with virulent MDV field strains – they show no obvious  
54 clinical symptoms but shed virulent virus (5). In fact there has been a continuous evolution of MDV  
55 virulence, with the emergence of hypervirulent pathotypes (6, 7). A potential role of current vaccines  
56 at driving virulence due to their inability to prevent infection and spread has been demonstrated (5).  
57 As vaccinated birds are still susceptible to superinfection by more virulent MDV subtypes, co-  
58 infection with vaccine and pathogenic strains are common in clinical materials such as poultry house  
59 dust (8).

60 A puzzling feature of MDV genomics is the very high sequence similarity between the virulent and  
61 vaccine strains. Despite the very different infection outcomes in vivo, the prototype virulent MDV  
62 strain RB-1B and the most effective vaccine strain, CVI-988, differ by only about 1% of their  
63 sequences. In fact the genomic differences between the RB-1B and CVI-988 strains are so limited  
64 that only one DNA-based assay (9, 10) is available to differentiate between them; the assay relies  
65 upon the detection of a few nucleotide substitutions localized to a single locus. Consequently, it  
66 would look like the differences at DNA level are not the best proxy to understand why the two  
67 strains behave so differently.

68 A much better vantage point might be represented by the viral transcriptome – for one thing, it has  
69 already been shown in the past that a number of herpesviruses have an unsuspectedly rich  
70 repertoire of RNAs (11-14). Detailed knowledge of the viral transcriptomes can also potentially shed  
71 a much better light on the different mechanisms taking place during virus-host interaction. In fact  
72 while our manuscript was under review, a study conducted by Betzbach and colleagues appeared in  
73 press reporting novel genes and a comprehensive annotation of MDV in primary B cells inoculated  
74 with BAC-derived MDV strains RB-1B or CVI-988 (15). Their study confirms that the community is  
75 increasingly interested in better understanding the complexity of viral transcriptomes that arise as a  
76 response to infection by closely related strains.

77 The work we report on here focuses on the differential expression of splice isoforms in CEF cells. Our  
78 primary goal was to establish a way of distinguishing pathogenic MDV from the CVI-988 vaccine  
79 strain by the detection of RNA transcripts differentially expressed by either strain in CEF cells. That  
80 led to the discovery of pervasive strain-dependent splicing, with markedly different splicing isoforms

81 (spliceforms) expressed despite the fact that the two strains are closely related. To the best of our  
82 knowledge, this is the first time that such a phenomenon is reported in the literature. In the work  
83 presented here we have also directly validated in vitro, using a technique based on real-time PCR,  
84 the differential expression of three splicing isoforms that are produced only by CVI-988. That  
85 represents a solid starting point in order to be able to discriminate the infections by the two MDV  
86 strains based on the differences between their transcriptomes.

## 87 Results

88 Briefly, we infected chicken embryo fibroblasts (CEFs) with two strains of MDV: virulent RB-1B and  
89 the vaccine strain CVI-988. RNA was extracted from them, and a polyA-enriched fraction was used to  
90 prepare complementary DNA (cDNA). cDNA was sequenced using Illumina technology (HiSeq  
91 2000/2500) with a directional protocol. Reads were mapped to several MDV strains using a sensitive  
92 analysis pipeline (see Materials and Methods for more details).

93 The number of reads mapped with high alignment scores to the genome of CVI-988 or RB-1B, as  
94 determined by the analysis pipeline, are shown in Table 1. Raw reads have been deposited into the  
95 NCBI Sequence Read Archive under project accession number PRJNA541962.

### 96 Splicing is pervasive in MDV

97 In CEFs, the viral transcriptome of the MDV strains we tested consists of a complex landscape of  
98 splicing isoforms, most of which are novel and have not been reported or included in the official  
99 genome annotations.

100 In detail, our analysis of spliced sequencing reads (see Materials and Methods) revealed 154 introns  
101 in MDV strain RB-1B and 246 in MDV strain CVI-988 after filtering out introns with low coverage (<10  
102 reads) and introns which are not spliced in all biological replicates (the complete list can be found in  
103 Supplementary Table 1). A small proportion of these introns, specifically those in the spliceforms of  
104 Meq, vIL18, ICP4, gC, pp38, MDV012, and LAT had already been identified and annotated (16-22)  
105 and are affirmed by this study. The localization of the introns on the MDV genome is presented in  
106 Figure 1 (see tracks 4, 6, 8 and 10), where each solid bar represents a different intron. The direction  
107 of splicing at acceptor/donor sites is indicated with a yellow arrow.

108 A number of positions appear to be alternative splice donors/acceptors, with several possible  
109 corresponding introns being selected by the splicing machinery (see Figure 2). The likelihood of such  
110 choice, which can be evaluated from RNA-sequencing data by comparing the coverage of the  
111 different splice junctions, is highly variable – it can be very similar or very different depending on the  
112 specific splice site. The distribution of splicing donors/acceptors is also not uniform across the whole  
113 genome, but rather concentrated in some specific regions, especially the inverted repeats and,  
114 surprisingly, the unique long region between 30 and 70kb (see Figure 1 and 3).

115 An interactive version of the data, presented as a genome browser, can be publicly accessed at  
116 <https://mallorn.pirbright.ac.uk/browsers/MDV-annotation/>.

### 117 Splicing is strain-specific, and occurring more frequently in MDV strain CVI-988

118 Many splicing isoforms appear to be produced by both strains, as expected given their similarity in  
119 nucleotide space. Despite this, one of our major findings is the identification of specific genomic  
120 regions that encode a number of isoforms which are strain specific, at least in infected CEFs.  
121 Examples are illustrated in Figure 2, where the presence of different spliceforms within the 14 kD  
122 locus is reported; in Figure 3, showing how a much greater number of spliced introns is encoded in  
123 the genome of MDV strain CVI-988 than those encoded in the genome of MDV strain RB-1B,

124 specifically on the negative strand of the UL region (coordinates 10-70 Kb); and in Figure 4, which  
125 reveals that this is not restricted just to the negative strand. Many similar examples of varying  
126 splicing isoforms could be found throughout the MDV genomes, corroborating the observation that  
127 the splicing patterns of MDV strains RB-1B and CVI-988 are significantly different, with much higher  
128 levels of splicing occurring in CEFs infected by MDV strain CVI-988.

### 129 Tentative reannotation of coding transcripts

130 In genomic regions with many consecutive multiple splicing donors/acceptors, such as the one  
131 shown in Figure 3, the combinatorics of alternative splicing are too complex to be solved with short  
132 reads. However, it is possible to exhaustively enumerate all coding spliced transcripts compatible  
133 with the introns observed. Here, we have taken such an approach to map sequences of putative  
134 exons to all open reading frames which would translate into a protein longer than 35 amino acids  
135 (see Materials and Methods). It should be emphasised that some of such predicted coding  
136 transcripts (in particular the more complex ones involving more than two exons) may not be present  
137 at all, and confirming their presence experimentally is outside of the scope of this manuscript.  
138 However, this tentative reannotation provides a fair representation of the splicing complexity at  
139 different viral loci. Importantly, while our tentative reannotation only considers coding transcripts,  
140 many more non-coding viral transcripts might potentially be found as well.

141 The reannotations can be accessed, and downloaded using the feature “Save track data”, through  
142 the genome browser mentioned above. Table 2 lists the number of putative coding spliceforms  
143 annotated for a number of relevant MDV genes when CEF cells are infected by MDV strain RB-1B or  
144 MDV strain CVI-988. In Figure 5, we illustrate in more detail four cases. In panel A, we show splicing  
145 events occurring in UL49/UL49.5 after infection by MDV strains RB-1B or CVI-988 (the latter event is  
146 referred to as I1 in Table 3). Each splicing event is unique, and the nucleotide sequences of the two  
147 spliceforms differ. In addition I1, the spliceform specific to MDV strain CVI-988, is present with  
148 higher read coverage (Table 3). Panel B describes 6 new possible splicing isoforms in the ICP4 gene  
149 of MDV strain CVI-988. Additionally we observed more splicing events which could not be assigned  
150 to the ICP4 gene itself as they were detected on the opposite strand. Panel C shows two new  
151 putative splicing isoforms for pp14 occurring in both MDV strains (in addition to the two already  
152 known) and another two novel ones occurring only in CVI-988. Panel D displays 14 novel splicing  
153 events occurring at the UL52/UL53/UL54 loci in CVI-988.

154 Our data confirms many MDV spliceforms previously reported in the literature. The splicing variant  
155 which was reported (20) between the ORF011 and ORF012 genes of MDV can be found in our  
156 RNASeq data – it is annotated on the genome browser as RB-1B-0865 or CVI-988-0883. In addition,  
157 we observed both spliced variants of pp38 in CEF cells infected with MDV strain RB-1B (RB-1B-0918  
158 and RB-1B-0919 according to the nomenclature used in our reannotation) and one spliced variant of  
159 pp38 in cells infected with CVI-988 (CVI-988-0979). In the gC region, we observed the two previously  
160 described splicing transcripts (19): namely RB-1B-0874 and RB-1B-0875; or CVI-988-0920 and CVI-  
161 988-0921 in RB-1B and CVI-988 infected CEFs, respectively. Additionally, we observed three further  
162 novel spliced isoforms – RB-1B-0933, RB-1B-0876, and RB-1B-0877 in CEFs infected with the RB-1B  
163 strain; and CVI-988-1051, CVI-988-0922, and CVI-988-0923 in CEFs infected with strain CVI-988. We  
164 observe a higher diversity in transcripts of the ICP4 gene in cells infected with MDV strain CVI-988  
165 than in cells infected with MDV strain RB-1B.

166 Although our data confirms many known spliceforms of MDV, we could not identify all of them. For  
167 example, we could not observe the spliceform between Meq and vIL8 loci which was described as  
168 meq $\Delta$ C-BamL in MSB-1 cells or infected CEF cells (16, 23). Unlike other previous reports (17), we only

169 observed one unspliced product for the Meq protein. In the IL8 region, we did not observe  
170 RLORF4/IL8 or RLORF5/vIL8 related transcripts (17). According to our data, an alternative start codon  
171 in vIL18 region could be employed to produce a novel transcript for vIL8 made of exons I and II of the  
172 gene, but representing an overlapping ORF (RB-1B-0928 or CVI-988-1019) to the main ORF of vIL8  
173 (RB-1B-0936 or CVI-988-1068). In the vIL8 region, splicing between exon I and exon II would produce  
174 a shorter transcript than the full vIL8 transcript, with a length of 379 nucleotides and containing an  
175 immature stop codon at the end of the second splice site (RB-1B-0929 or CVI-988-1020).

### 176 Selection of strain-dependent introns

177 By comparing the coverage in spliced reads at the same genomic positions between virulent (RB-1B)  
178 and vaccine (CVI-988) MDV strains, a list of viral introns showing the highest variation between  
179 strains was generated (Table 3, see Materials and Methods for a description of the procedure used).  
180 According to this coverage-based ranking and feasibility of real-time PCR probe design, three introns  
181 that were exclusively spliced in the CVI-988 transcriptome (indicated in Table 3 as I1, I2, and I3) were  
182 selected for further study. Introns I1 and I2 are highlighted in Figure 4, while intron I3 can be found  
183 in Figure 3.

### 184 The kinetics of I1 expression in CEFs transfected with MDV strains CVI-988 and RB-1B

185 In order to determine the time window during which I1 was transcribed from the MDV genome, its  
186 time-dependent expression was subsequently determined using qRT-PCR on RNA isolated from CEFs  
187 infected with both MDV strains RB-1B and CVI-988. MDV is avidly cell associated, which makes it  
188 problematic to achieve synchronised expression of viral transcripts due to in vitro growth differences  
189 between attenuated CVI-988 and virulent RB-1B. Hence the time course experiment was performed  
190 by transfecting CEFs with equimolar amount of recombinant bacterial artificial chromosome (BAC)  
191 containing the complete genomes of MDV strains CVI-988 and RB-1B (24, 25). Expression levels were  
192 assessed from transfected cells harvested at nine different time points ranging from 0 to 90 hours  
193 post transfection, using GAPDH as a reference for relative quantitation (Figure 6 panel B).

194 Intron I1 is expressed at roughly equal levels in both MDV strains RB-1B and CVI-988 infected cells  
195 until 54 hours post transfection (the baseline being that GAPDH is about  $4 \times 10^6$  times more expressed  
196 than I1). However, starting from 66 hours post transfection the expression of I1 progressively  
197 increases (with differences becoming statistically significant) in cells transfected with MDV strain  
198 CVI-988. The peak is recorded at 90 hours post transfection, when the expression level is about 100  
199 times greater in cells transfected with MDV strain CVI-988 than in cells transfected with MDV strain  
200 RB-1B. This finding agrees with the earlier observation deduced from RNA-sequencing data that at 3  
201 days post infection, and increasingly so, I1 is expressed at exceedingly greater levels in CEFs infected  
202 by CVI-988 than in cells infected by RB-1B, making I1 a good candidate marker to discriminate  
203 between the two strains. A viral transcript was used to assess transfection efficiency, and its level  
204 was similar in CEF cells transfected with either of the strains (data not shown).

### 205 I1 is detectable even at low viral loads

206 The expression differentials just described remain true at 5 days post infection across a wide range  
207 of virus infectious loads. The expression levels of I1 were quantified using relative RT-PCR with RNA  
208 isolated from  $1.3 \times 10^6$  CEF cells infected with 1,000, 100 or 10 PFU of MDV strains RB-1B or CVI-988  
209 in 9 cm<sup>2</sup> tissue culture dishes (Figure 6 panel A) – due to the cell-associated nature of MDV, we were  
210 unable to calculate MOI. The following lists the results:



- 211 1. The expression of the housekeeping gene, GAPDH remained unchanged at a 40-Ct value of  
212 ~18 across the different PFU levels ( $p = 0.48$  based on a two-way repeated measures ANOVA  
213 test) and independent of the strain.
- 214 2. In CEFs infected by MDV strain CVI-988 the levels of expression of I1 also correlated very  
215 well with inoculum titres (Pearson's  $r = 0.98$ ,  $p$ -value  $6.1 \times 10^{-6}$ ) and I1 was detectable across  
216 the whole PFU range.
- 217 3. I1 expression was undetectable in  $1.3 \times 10^6$  CEFs infected with 100 or 10 PFU of MDV strain  
218 RB-1B. In cells infected with 1,000 PFU I1 levels were still extremely low (averaged 40-Ct  
219 value 2.4).

220 Overall, our results support the use of intron I1 as a biomarker across a wide range of viral titres.  
221 Whenever it should be detectable – i.e. in CEFs infected by MDV strain CVI-988 starting from roughly  
222 60 hours post infection – it remains so even at very low virus input, and its abundance at 5 days post  
223 infection in vitro shows a very clear and predictable linear relationship with virus input. We assumed  
224 that these findings would be generalizable to I2 and I3.

### 225 Differential expression of I1, I2, and I3 in MDV strains RB-1B and CVI-988

226 At 5 days post infection all our three candidate introns (I1, I2, and I3) are differentially expressed in  
227 CEFs infected with MDV strains RB-1B and CVI-988. Such differential expression can be quantified  
228 using GAPDH as PCR calibrator.

229 Briefly, in order to precisely calculate expression levels, standard curves using PCR-amplified or  
230 cloned fragments of DNA representing I1, I2, I3, and GAPDH were first made and used to calculate  
231 PCR efficiency. Each amplicon was Sanger sequenced in order to confirm that the sequence  
232 identified by PCR corresponded with that of the splice junction predicted from RNA-sequencing data.  
233 The expression levels of the three biomarkers (I1, I2, I3) in CEFs infected by MDV strains RB-1B or  
234 CVI-988 at 5 days post infection ( $N=6$ ) were computed and normalised against GAPDH, in order to  
235 achieve accurate calibration. Fresh virus stock obtained after only two passages was used for  
236 infection for both strains. Full details are described in Material and Methods.

237 The results are presented in Figure 7, and represent one of the main outcomes of this paper. When  
238 comparing expression in CEFs infected with MDV strain CVI-988 to expression in CEFs infected with  
239 MDV strain RB-1B, the greatest fold-change was observed for intron I1, which appeared to be  
240 expressed ~2800 times more when GAPDH was used as a calibrator. I2 and I3 exhibit fold-changes  
241 that are lower than those of I1 but still easily measurable and statistically significant (I2 vs. GAPDH:  
242 6.3; I3 vs. GAPDH: 5.3) confirming the ranking originally deduced from RNA-sequencing data (Table  
243 3).

## 244 Discussion

245 The pathobiology of Marek's disease virus is complex (26). This alphaherpesvirus is able to infect  
246 chicken cells and cause tumours in a wide variety of tissues. The outcome is that virions are shed  
247 into the environment as infectious dander (5), while cell free viruses can hardly be detected in  
248 vitro in the supernatants of any cell line. Some Mardivirus-specific genes have been identified and  
249 characterized, but more research is needed to understand the molecular mechanisms responsible  
250 for its complex life cycle, especially at the transcriptional level.

251 A number of studies based on high-throughput RNA-sequencing conducted with a number of  
252 technologies – including Illumina, Pacific Biosciences and Oxford Nanopore – have been published so  
253 far for all subfamilies of herpesviruses: the alphaherpesviruses herpes simplex virus (11, 12) and  
254 pseudorabies virus (27, 28); the betaherpesvirus cytomegalovirus (CMV); the gammaherpesvirus

255 Epstein-Barr virus (EBV) and Kaposi's sarcoma-associated herpesvirus (13, 14, 29). For several of  
256 those, the viral transcriptome has even been characterised for several tissues and biological  
257 conditions. A similar extensive characterisation for MDV has been lacking for a long time. In the past,  
258 some MDV transcripts had been determined through northern blot analysis and the nucleotide  
259 sequencing of a limited number of cDNA products, most notably the spliced variants of MDV's  
260 oncogene Meq (16), vIL8 (17) and glycoprotein C (19). Very recently, a study of MDV infection in B  
261 cells has identified novel transcripts and genes (15). To expand on this, we report on the viral  
262 transcriptome of MDV using high-throughput short-read RNA sequencing on RNA isolated from CEF  
263 cells infected with MDV virulent strain – RB-1B (30) – and MDV attenuated vaccine strain – CVI-988  
264 (31).

265 Interestingly, and consistent with what can be observed across the *Herpesviridae* family and in MDV-  
266 infected B cells, our results show that RNA splicing is pervasive in CEFs infected with these strains,  
267 giving rise to hundreds of so far unannotated spliceforms which biological significance remain  
268 undefined and in need of further investigation. The level of complexity we find is similar to what was  
269 observed for CMV (13) or EBV (29). For instance, in CMV infected cells a total of 751 ORF were  
270 identified which are transcribed and translated into proteins (13). During EBV reactivation, a high  
271 level of bidirectional transcription was observed (29). The complex transcription landscape that map  
272 to the UL region of MDV suggest that in addition to transcripts encoding early and late gene  
273 products other functional categories might be present, with a number of them possibly having  
274 regulatory functions in the control of gene products expression. This has been observed for both  
275 pseudorabies and herpesvirus simplex (12, 27, 28).

276 The intron I1 we identified could potentially represent a new protein-coding transcript which is  
277 transcribed from the UL49 locus of MDV strain CVI-988. It is reported that the VP22 protein of MDV  
278 is involved in cell cycle arrest, virus spread and histone association during MDV replication in vitro  
279 (32). Further studies will be required in order to investigate the involvement of the I1 transcript in  
280 the interaction between virus and host.

281 One should note that there are limitations to the sensitivity of the technique we employed in this  
282 study – in particular, spliceforms that are too weak with respect to the most abundant RNA species  
283 will not be detectable, depending on the number of sequencing reads generated during the  
284 experiment. In fact, as described in the Results section, a number of splicing isoforms identified in  
285 previous studies by qPCR could not be found in our data. Whether this is due to limited sensitivity or  
286 to the fact that such isoforms are specific to other experimental conditions – for instance, (23) used  
287 MSB1 cells rather than CEFs – the conclusion can only be that the potential size of the MDV  
288 transcriptome is even larger than what emerges from our study. That is confirmed by the novel  
289 transcripts identified in (15). Again, this is entirely similar to what can be seen for other  
290 herpesviruses – in previously studied CMV infected cells, the authors were unable to identify some  
291 of the previously annotated genes (13).

292 Further complementary investigations based on long-read technologies (e.g. Pacific Biosciences) will  
293 also be required to fully resolve the genomic structure of long spliced transcripts being made of  
294 many consecutive exons.

295 Even more interestingly, a significant number of viral splicing isoforms of MDV strains CVI-988 and  
296 RB-1B appear to be strain-specific, despite the high sequence similarity (>99%) between the two  
297 strains. We validated this finding by using a Taqman-based assay. The assay was proven to be  
298 reproducible. As far as we know such a striking result had not been previously reported in the  
299 literature, and it is not reported in (15) either. Not surprisingly, our preliminary analysis of the host

300 transcriptome (data not shown) indicates that the splicing of host transcripts also depends on the  
301 virulence of the infected strains. We point out that the effect we notice cannot be ascribed to  
302 culture adaptation – as explained in the Material and Methods section, both MDV strain RB-1B and  
303 MDV strain CVI-988 stocks we used underwent only two passages before being used for infection.  
304 Likewise, what we observe cannot be explained away by the known fact that splicing tends to be  
305 highly unregulated in tissue culture cells for most herpesviruses, including MDV (17) – even in the  
306 presence of an equally permissive environment for splicing, MDV strain RB-1B appears to produce a  
307 much more limited number of splicing isoforms across the genome than MDV strain CVI-988. It is  
308 possible that the greater propensity for splicing exhibited by MDV strain CVI-988 indirectly derives  
309 from the fact that its attenuation was obtained by repeated passaging the strain in cell culture, but  
310 by now the trait has apparently been fixed in its genome, which is an interesting biological fact.

311 Taken together, our results suggest the possibility that different MDV strains might interact  
312 differently with the splicing machinery of the host; a different interaction of the spliceosome and  
313 associated proteins with the MDV genome in CEFs infected by the strain CVI-988 might result in a  
314 much richer splicing landscape. However, it is not possible at this stage to pinpoint the responsible  
315 for such differences at a molecular level – for instance, in the ICP27 region our data shows similar  
316 splicing patterns for MDV strain RB-1B and strain CVI-988 (with only one intron present in the strain  
317 CVI-988 and not in the strain RB-1B) and no differential expression (corrected p-value for differential  
318 expression computed by edgeR = 0.65), so it is unclear at the moment whether ICP27 might be  
319 responsible for what we observe.

320 As the results of RNA-sequencing describe the averaged collective nature of a relatively large  
321 number of infected cells, it is hard to say whether those differences are typical of every infected cell  
322 or just a smaller sub-population. In order to truly reveal the complexity of alternative splicing across  
323 diverse cell and tissue types, in future studies it might be prudent to sequence the RNA  
324 transcriptome of individual cells, especially from tissues (e.g. lymphocytes, tumours, FFE, etc.) of  
325 experimentally infected birds, and use proteomics to determine whether splice-variant transcripts  
326 are translated into protein products or just have RNA regulatory functions. We also plan to define  
327 the virus transcriptome in various tissues isolated from vaccinated/challenged bird that that are  
328 susceptible and resistant to Marek's disease. That might help elucidate the molecular mechanisms  
329 underlying the diversity that we observe in splicing landscapes.

330 Overall, the data presented in this report suggest the presence of a large number of spliced viral  
331 transcripts in infected CEFs, allowing us to identify spliceforms that contain introns exclusive to the  
332 MDV strain CVI-988. Building upon such findings we have also designed primers and probes that can  
333 specifically detect such transcripts, thus effectively differentiating in CEFs the transcriptome of MDV  
334 strain CVI-988 from that of strain RB-1B. To the best of our knowledge, this study is the first one ever  
335 to propose a technique based on the differential detection of splicing events.

336 Obvious questions to be elucidated in the future are whether our results can be extended to other  
337 tissues/MDV strains; and whether differential expression of I1-I3 (or possibly other spliceforms yet  
338 to be identified) can also be detected in vivo.

## 339 Acknowledgements

340 We thank Dr Luca Ferretti for providing statistical advice. The Pirbright Institute receives grant-aided  
341 support from the Biotechnology and Biological Sciences Research Council of the United Kingdom  
342 (projects BB/E/I/00007035, BB/E/I/00007036 and BBS/E/I/00007039). We also acknowledge support  
343 from BBSRC grants BBS/E/I/00001942 and BB/K011057/1. Mention of trade names or commercial



344 products in this publication is solely for the purpose of providing specific information and does not  
345 imply recommendation or endorsement by the U.S. Department of Agriculture. This work was  
346 funded in part by USDA-ARS CRIS project number 6040-32000-074-00D.

## 347 Conflict of interest

348 The authors declare no competing interest.

## 349 Authors' contributions

350 The project was designed and conceived by ATA, PR and VN. Sample preparation for high-  
351 throughput sequencing was performed by ATA. Bioinformatics analysis was conducted by PR with  
352 assistance from SS. Real-time PCR experiments were designed and conducted by YS. The manuscript  
353 was prepared by PR, YS, SS and VN. All authors read and approved the manuscript.

## 354 Materials and methods

### 355 RNA-sequencing

#### 356 Virus history

357 Splenocytes from a MDV strain RB1B infected bird (no.3345/KV16) were used to prepare a first  
358 passage of RB-1B virus stock. A second passage of MDV strain RB-1B was prepared using the first  
359 stock and used for RNA isolation, as described in the next section. MDV strain CV-1988 was prepared  
360 from CEF cells with two passage history after they were infected with Nobilis Rismavac vaccine virus.  
361 The passage 2 virus stock was used for RNA isolation, as described below.

#### 362 Sample preparation

363 Confluent CEFs in a 75 cm<sup>2</sup> flask (8.0 X 10<sup>6</sup> cells in each flask) were infected with 1500 pfu of CVI-988  
364 or RB-1B virus in DMEM containing 5% FBS and the antibiotic streptomycin (100µg/ml) and penicillin  
365 (100U/ml).

366 The flasks were incubated for five days at 37°C in 5% CO<sub>2</sub> and RNA was isolated using Trizol  
367 (Ambion) according to the method described by the manufacturer. For each biological condition  
368 (CEFs infected with MDV RB-1B very virulent strain; and CEFs infected with MDV CVI-988 vaccine  
369 strain) two biological replicates were selected.

#### 370 Sequencing

371 RNA samples were sequenced at the Centro Nacional de Análisis Genómico (Barcelona, Spain).  
372 Briefly, total RNA was assayed for quantity and quality using Qubit<sup>®</sup> RNA HS Assay (Life  
373 Technologies) and RNA 6000 Nano Assay on a Bioanalyzer 2100. The experimental protocol to  
374 construct stranded mRNA RNASeq libraries starting from the total RNA employed the  
375 TruSeq<sup>®</sup>Stranded mRNA LT Sample Prep Kit (Illumina Inc., Rev.E, October 2013). The initial input was  
376 0.5 ug of total RNA for each sample. The size and quality of each final library were validated on an  
377 Agilent 2100 Bioanalyzer with the DNA 7500 assay (Agilent). Libraries were sequenced using TruSeq  
378 SBS Kit v3-HS in paired end mode with the read length 2x76bp. Each sample was sequenced in a  
379 fraction of a sequencing lane on a HiSeq2000/2500 machine (Illumina) following the manufacturer's  
380 protocol, generating between 59 and 87 million paired end reads per sample. Images analysis, base  
381 calling and quality scoring of the run were performed using the manufacturer's software Real Time  
382 Analysis (RTA 1.13.48) and were followed by generation of FASTQ sequence files with CASAVA 1.8.  
383 For this analysis the two biological replicates available for each MDV strain (RB-1B and CVI-988) were  
384 pooled together prior to analysis, in order to increase the overall read coverage.

## 385 [Bioinformatics selection of biomarkers](#)

### 386 [Primary analysis](#)

387 Reads were subjected to preliminary quality control and processed with a workflow for primary data  
388 analysis based on the GEM mapper (33) which is an evolution of the method used to process the  
389 data produced by the GEUVADIS consortium (34). Contrary to other methods relying on accurate  
390 annotations, this one includes a highly sensitive de-novo intron detection step. This feature enabled  
391 accurate alignments in spite of errors or limitations in the available annotation of cellular transcripts,  
392 and an unbiased picture of splicing in different MDV strains.

393 It should be noted that separately aligning MDV RB-1B reads to the RB-1B genome and MDV CVI-988  
394 reads to CVI-988 would have not been possible for this analysis, as during subsequent stages we  
395 needed to compare coverage of the same intron across different viruses. In order to be able to do  
396 so, reads from samples infected with different viruses (MDV strains RB-1B and CVI-988) were all  
397 aligned to the same MDV MD5 reference (NCBI accession number AF243438). Although in principle  
398 this procedure might decrease the amount of reads successfully mapped and potentially introduce  
399 artefacts, in practice it works well due to the high sequence similarity of the strains involved in the  
400 experiment – the conclusions presented in the paper are qualitatively identical when reads from  
401 both infections (RB-1B and CVI-988) are aligned to either MDV strains (MDV strain RB-1B, NCBI  
402 accession EF523390, or MDV strain CVI-988, accession DQ530348). As a relevant fraction of MDV  
403 genome is replicated twice – see for instance Figure 1, where mappability (35) for the genome is  
404 shown – reads aligning to more than one location of the genome were assigned to all locations, with  
405 normalisation  $1/(\text{number of alignments})$ . Keeping only uniquely mapping reads, as is often done in  
406 RNA-seq data analysis, would have resulted in complete loss of signal in the repeated regions of the  
407 virus.

### 408 [Tentative annotation of full spliced coding transcripts](#)

409 The workflow used for primary analysis of each sample generated a list of introns, each one  
410 annotated with the number of spliced reads covering it. Introns having a coverage of 10 reads of  
411 more were kept, candidate exons were deduced from them, and an in-house script was used to  
412 generate all possible coding sequences of exons compatible with translation start and end signals  
413 present in MDV genome. Only putative transcripts leading to protein sequences longer than 35  
414 amino acids were kept. This step was performed separately for the RB-1B and the CVI-988 data.

### 415 [Selection of relevant MDV encoded introns](#)

416 The intron list obtained after primary analysis was also split based on the following criteria: (i) viral  
417 introns that have a sufficient read coverage in CEFs infected with MDV strain RB-1B, and no coverage  
418 in CEFs infected with strain CVI-988; (ii) viral introns having sufficient read coverage in CEFs infected  
419 with strain CVI-988, and no coverage in CEFs infected with strain RB-1B. Introns were considered to  
420 be sufficiently populated whenever they had non-zero coverage in all biological replicates and the  
421 sum of their coverage across all replicates was  $\geq 20$  (arbitrary threshold). Finally, the list of introns  
422 was prioritised based on the geometric mean of the coverage in spliced reads across all replicates.  
423 An arbitrary final minimum threshold of 25 was used for the mean, in order to exclude from the list  
424 candidates with low level expression.

### 425 [Differential expression of transcripts](#)

426 The differential expression for ICP27 mentioned in the Discussion was computed using edgeR (36)  
427 version 3.20.9.

## 428 [Data visualisation](#)

429 The genome browser is based on a customised version of JBrowse (37).

## 430 [In-vitro validation of the internal RT-PCR control, GAPDH](#)

### 431 [Sample preparation](#)

432 MDV strain RB-1B and CVI-988 were propagated as previously described (9, 10). To prepare samples  
433 for real time PCR, CEFs were infected in 9.8 cm<sup>2</sup> wells (6 well plates, 1.3x10<sup>6</sup> cells in each well) with  
434 500 pfu of MDV strains RB-1B or CVI-988. Uninfected and infected cells were harvested for RNA  
435 purification using Trizol reagent (Ambion) as described by the manufacturer.

436 For the time course experiment, semi-confluent CEFs (80%) were transfected with 1 µg of RB-1B or  
437 CVI-988 BAC DNA clone using 10 µl of lipofectamine transfection reagent (Life Technologies) in 9.8  
438 cm<sup>2</sup> tissue culture plates. Three independent transfection was conducted to have 3 replicates (N=3).  
439 At 6, 12, 18, 30, 42, 54, 66, 87 and 90 hours post transfection, CEFs were harvested from the plates,  
440 washed with PBS, suspended in RLT buffer (Qiagen) and stored at -80°C until the time of RNA  
441 purification. RNA was isolated using RNeasy (Qiagen) and the contaminating DNA was destroyed by  
442 DNaseI treatment (New England Biolabs). cDNA was synthesized using RevertAid H minus reverse  
443 transcriptase (ThermoFisher Scientific) with random hexamers. Real-time PCR for I1 and GAPDH was  
444 conducted as described in (10, 38).

### 445 [Primers and probes](#)

446 Primers and probes were designed for each splicing isoforms using the PrimerQuest tool provided by  
447 Integrated DNA Technologies (IDT). Each probe was designed to span the splice junction, to avoid  
448 non-specific interaction between closely related splice variants. A list of primers and probes, sizes of  
449 the amplicons, and location of targeted introns is provided in Supplementary Table 3. GAPDH was  
450 used as the host gene. A pair of primers and a probe for the splice junction between exons 5 and 6  
451 was designed to be used to detect the level of GAPDH cDNA. Each probe was labelled with 5'FAM  
452 reporter, ZEN™ and 3'-BHQ1 quenchers (Integrated DNA technology, IDT).

### 453 [Relative quantitative RT-PCR](#)

454 Real time qRT-PCR was performed using Absolute blue qPCR mix (Thermo Scientific), primer pairs  
455 (each 0.4 µM) and probe (0.2 µM) for the splice junctions of interest. To generate a standard curve,  
456 splice junction amplicons were cloned in pGEM-T plasmid (Promega) and subjected to Sanger  
457 sequencing. Ten-fold serial dilutions were prepared to produce a range from 1 nM to 10 fM. Every  
458 real-time PCR run included, specific primers and probe for one of the splice junctions, the primers  
459 and probes for GAPDH, and the primers and probe for the virus control and were performed in  
460 triplicates. The reaction were processed on a 7500 Fast Real-time PCR system (Applied Biosystems)  
461 with reaction conditions specified by the master mix manufacturer. Data was collected and analysed  
462 using 7500 Software (v2.3, Applied Biosystems).

### 463 [Accession numbers](#)

464 The raw sequencing reads have been deposited into the NCBI Sequencing Read Archive (SRA) under  
465 the project accession number PRJNA541962. The files corresponding to CEF cells infected with RB-1B  
466 and CVI-988 strains, each in two replicates, can be downloaded as accession numbers SRR9030404,  
467 SRR9030405, SRR9030406, and SRR9030407.

## 468 References

- 469 1. **Schat K, Nair V.** 2013. Neoplastic diseases: Marek's disease, p 515-552. *In* Swayne D, Glisson  
470 J, McDougald L, Nolan L, Suarez D, Nair V (ed), Diseases of poultry, 13 ed. Wiley-Blackwell,  
471 Hoboken, NJ.
- 472 2. **Baigent SJ, Smith LP, Nair VK, Currie RJ.** 2006. Vaccinal control of Marek's disease: current  
473 challenges, and future strategies to maximize protection. *Vet Immunol Immunopathol*  
474 **112**:78-86.
- 475 3. **Reddy SM, Izumiya Y, Lupiani B.** 2016. Marek's disease vaccines: Current status, and  
476 strategies for improvement and development of vector vaccines. *Vet Microbiol*  
477 doi:10.1016/j.vetmic.2016.11.024.
- 478 4. **Schat KA, Nair V.** 2013. Neoplastic diseases: Marek's disease, p 515-552. *In* Swayne DE,  
479 Glisson JR, McDougald LR, Nolan LK, Suarez DL, Nair VL (ed), Diseases of poultry, 13th ed.  
480 Wiley-Blackwell, Hoboken, NJ.
- 481 5. **Read AF, Baigent SJ, Powers C, Kgosana LB, Blackwell L, Smith LP, Kennedy DA, Walkden-**  
482 **Brown SW, Nair VK.** 2015. Imperfect Vaccination Can Enhance the Transmission of Highly  
483 Virulent Pathogens. *PLoS Biol* **13**:e1002198.
- 484 6. **Witter RL.** 2005. Marek's disease: The continuing struggle between pathogen and host. *Vet J*  
485 **170**:149-150.
- 486 7. **Witter RL.** 1998. The changing landscape of Marek's disease. *Avian Pathol* **27**:S46-S53.
- 487 8. **Kennedy DA, Cairns C, Jones MJ, Bell AS, Salathe RM, Baigent SJ, Nair VK, Dunn PA, Read**  
488 **AF.** 2017. Industry-Wide Surveillance of Marek's Disease Virus on Commercial Poultry Farms.  
489 *Avian Dis* **61**:153-164.
- 490 9. **Baigent SJ, Smith LP, Petherbridge LJ, Nair VK.** 2011. Differential quantification of cloned  
491 CVI988 vaccine strain and virulent RB-1B strain of Marek's disease viruses in chicken tissues,  
492 using real-time PCR. *Res Vet Sci* **91**:167-174.
- 493 10. **Baigent SJ, Nair VK, Le Galludec H.** 2016. Real-time PCR for differential quantification of  
494 CVI988 vaccine virus and virulent strains of Marek's disease virus. *J Virol Methods* **233**:23-36.
- 495 11. **Tombacz D, Balazs Z, Csabai Z, Moldovan N, Szucs A, Sharon D, Snyder M, Boldogkoi Z.**  
496 2017. Characterization of the Dynamic Transcriptome of a Herpesvirus with Long-read Single  
497 Molecule Real-Time Sequencing. *Sci Rep* **7**:43751.
- 498 12. **Tombacz D, Csabai Z, Szucs A, Balazs Z, Moldovan N, Sharon D, Snyder M, Boldogkoi Z.**  
499 2017. Long-Read Isoform Sequencing Reveals a Hidden Complexity of the Transcriptional  
500 Landscape of Herpes Simplex Virus Type 1. *Front Microbiol* **8**:1079.
- 501 13. **Stern-Ginossar N, Weisburd B, Michalski A, Le VT, Hein MY, Huang SX, Ma M, Shen B, Qian**  
502 **SB, Hengel H, Mann M, Ingolia NT, Weissman JS.** 2012. Decoding human cytomegalovirus.  
503 *Science* **338**:1088-1093.
- 504 14. **Arias C, Weisburd B, Stern-Ginossar N, Mercier A, Madrid AS, Bellare P, Holdorf M,**  
505 **Weissman JS, Ganem D.** 2014. KSHV 2.0: a comprehensive annotation of the Kaposi's  
506 sarcoma-associated herpesvirus genome using next-generation sequencing reveals novel  
507 genomic and functional features. *PLoS Pathog* **10**:e1003847.
- 508 15. **Bertzbach LD, Pfaff F, Pauker VI, Kheimar AM, Hoper D, Hartle S, Karger A, Kaufer BB.**  
509 2019. The Transcriptional Landscape of Marek's Disease Virus in Primary Chicken B Cells  
510 Reveals Novel Splice Variants and Genes. *Viruses* **11**.
- 511 16. **Peng Q, Shirazi Y.** 1996. Characterization of the protein product encoded by a splicing  
512 variant of the Marek's disease virus Eco-Q gene (Meq). *Virology* **226**:77-82.
- 513 17. **Jarosinski KW, Schat KA.** 2007. Multiple alternative splicing to exons II and III of viral  
514 interleukin-8 (vIL-8) in the Marek's disease virus genome: the importance of vIL-8 exon I.  
515 *Virus Genes* **34**:9-22.
- 516 18. **Li DS, Pastorek J, Zelnik V, Smith GD, Ross LJ.** 1994. Identification of novel transcripts  
517 complementary to the Marek's disease virus homologue of the ICP4 gene of herpes simplex  
518 virus. *J Gen Virol* **75 ( Pt 7)**:1713-1722.

- 519 19. **Jarosinski KW, Osterrieder N.** 2012. Marek's disease virus expresses multiple UL44 (gC)  
520 variants through mRNA splicing that are all required for efficient horizontal transmission. *J*  
521 *Virology* **86**:7896-7906.
- 522 20. **Schippers T, Jarosinski K, Osterrieder N.** 2015. The ORF012 gene of Marek's disease virus  
523 type 1 produces a spliced transcript and encodes a novel nuclear phosphoprotein essential  
524 for virus growth. *J Virology* **89**:1348-1363.
- 525 21. **Hearn C, Preeyanon L, Hunt HD, York IA.** 2015. An MHC class I immune evasion gene of  
526 Marek's disease virus. *Virology* **475**:88-95.
- 527 22. **Li X, Jarosinski KW, Schat KA.** 2006. Expression of Marek's disease virus phosphorylated  
528 polypeptide pp38 produces splice variants and enhances metabolic activity. *Vet Microbiol*  
529 **117**:154-168.
- 530 23. **Parcells MS, Lin SF, Dienglewicz RL, Majerciak V, Robinson DR, Chen HC, Wu Z, Dubyak GR,**  
531 **Brunovskis P, Hunt HD, Lee LF, Kung HJ.** 2001. Marek's disease virus (MDV) encodes an  
532 interleukin-8 homolog (vIL-8): characterization of the vIL-8 protein and a vIL-8 deletion  
533 mutant MDV. *J Virology* **75**:5159-5173.
- 534 24. **Petherbridge L, Howes K, Baigent SJ, Sacco MA, Evans S, Osterrieder N, Nair V.** 2003.  
535 Replication-competent bacterial artificial chromosomes of Marek's disease virus: novel tools  
536 for generation of molecularly defined herpesvirus vaccines. *J Virology* **77**:8712-8718.
- 537 25. **Petherbridge L, Brown AC, Baigent SJ, Howes K, Sacco MA, Osterrieder N, Nair VK.** 2004.  
538 Oncogenicity of virulent Marek's disease virus cloned as bacterial artificial chromosomes. *J*  
539 *Virology* **78**:13376-13380.
- 540 26. **Davison TF, Nair V, Institute for Animal Health (Great Britain).** 2004. Marek's disease : an  
541 evolving problem. Elsevier, Amsterdam ; Boston.
- 542 27. **Moldovan N, Tombacz D, Szucs A, Csabai Z, Snyder M, Boldogkoi Z.** 2017. Multi-Platform  
543 Sequencing Approach Reveals a Novel Transcriptome Profile in Pseudorabies Virus. *Front*  
544 *Microbiol* **8**:2708.
- 545 28. **Tombacz D, Csabai Z, Olah P, Balazs Z, Liko I, Zsigmond L, Sharon D, Snyder M, Boldogkoi Z.**  
546 2016. Full-Length Isoform Sequencing Reveals Novel Transcripts and Substantial  
547 Transcriptional Overlaps in a Herpesvirus. *PLoS One* **11**:e0162868.
- 548 29. **O'Grady T, Cao S, Strong MJ, Concha M, Wang X, Splinter Bondurant S, Adams M, Baddoo**  
549 **M, Srivastav SK, Lin Z, Fewell C, Yin Q, Flemington EK.** 2014. Global bidirectional  
550 transcription of the Epstein-Barr virus genome during reactivation. *J Virology* **88**:1604-1616.
- 551 30. **Schat KA, Calnek BW, Fabricant J.** 1982. Characterisation of two highly oncogenic strains of  
552 Marek's disease virus. *Avian Pathol* **11**:593-605.
- 553 31. **Rispens BH, van Vloten H, Mastenbroek N, Maas HJ, Schat KA.** 1972. Control of Marek's  
554 disease in the Netherlands. I. Isolation of an avirulent Marek's disease virus (strain CVI 988)  
555 and its use in laboratory vaccination trials. *Avian Dis* **16**:108-125.
- 556 32. **Trapp-Fragnet L, Courvoisier K, Remy S, Pape GL, Loustalot F, Denesvre C.** 2019.  
557 Identification of Marek's Disease Virus VP22 Tegument Protein Domains Essential for Virus  
558 Cell-to-Cell Spread, Nuclear Localization, Histone Association and Cell-Cycle Arrest. *Viruses*  
559 **11**.
- 560 33. **Marco-Sola S, Sammeth M, Guigo R, Ribeca P.** 2012. The GEM mapper: fast, accurate and  
561 versatile alignment by filtration. *Nat Methods* **9**:1185-1188.
- 562 34. **Lappalainen T, Sammeth M, Friedlander MR, t Hoen PA, Monlong J, Rivas MA, Gonzalez-**  
563 **Porta M, Kurbatova N, Griebel T, Ferreira PG, Barann M, Wieland T, Greger L, van Iterson**  
564 **M, Almlof J, Ribeca P, Pulyakhina I, Esser D, Giger T, Tikhonov A, Sultan M, Bertier G,**  
565 **MacArthur DG, Lek M, Lizano E, Buermans HP, Padioleau I, Schwarzmayr T, Karlberg O,**  
566 **Ongen H, Kilpinen H, Beltran S, Gut M, Kahlem K, Amstislavskiy V, Stegle O, Pirinen M,**  
567 **Montgomery SB, Donnelly P, McCarthy MI, Flicek P, Strom TM, Geuvadis C, Lehrach H,**  
568 **Schreiber S, Sudbrak R, Carracedo A, Antonarakis SE, Hasler R, Syvanen AC, et al.** 2013.



- 569 Transcriptome and genome sequencing uncovers functional variation in humans. *Nature*  
570 **501**:506-511.
- 571 35. **Derrien T, Estelle J, Marco Sola S, Knowles DG, Raineri E, Guigo R, Ribeca P.** 2012. Fast  
572 computation and applications of genome mappability. *PLoS One* **7**:e30377.
- 573 36. **McCarthy DJ, Chen Y, Smyth GK.** 2012. Differential expression analysis of multifactor RNA-  
574 Seq experiments with respect to biological variation. *Nucleic Acids Res* **40**:4288-4297.
- 575 37. **Skinner ME, Uzilov AV, Stein LD, Mungall CJ, Holmes IH.** 2009. JBrowse: a next-generation  
576 genome browser. *Genome Res* **19**:1630-1638.
- 577 38. **Baigent SJ, Petherbridge LJ, Howes K, Smith LP, Currie RJ, Nair VK.** 2005. Absolute  
578 quantitation of Marek's disease virus genome copy number in chicken feather and  
579 lymphocyte samples using real-time PCR. *J Virol Methods* **123**:53-64.
- 580 39. **Tulman ER, Afonso CL, Lu Z, Zsak L, Rock DL, Kutish GF.** 2000. The genome of a very virulent  
581 Marek's disease virus. *J Virol* **74**:7980-7988.
- 582 40. **Lee LF, Wu P, Sui D, Ren D, Kamil J, Kung HJ, Witter RL.** 2000. The complete unique long  
583 sequence and the overall genomic organization of the GA strain of Marek's disease virus.  
584 *Proc Natl Acad Sci U S A* **97**:6091-6096.
- 585 41. **Spatz SJ, Petherbridge L, Zhao Y, Nair V.** 2007. Comparative full-length sequence analysis of  
586 oncogenic and vaccine (Rispens) strains of Marek's disease virus. *J Gen Virol* **88**:1080-1096.
- 587 42. **Hong Y, Coussens PM.** 1994. Identification of an immediate-early gene in the Marek's  
588 disease virus long internal repeat region which encodes a unique 14-kilodalton polypeptide.  
589 *J Virol* **68**:3593-3603.
- 590

## 591 Figure legends

592

593

594 **Figure 1. The splicing landscape of MDV infected CEFs.** An overview of splicing in CEFs infected with  
595 two strains of MDV at 5 days post infection. Results are presented as a genome browser, each label  
596 on the left corresponding to a different track on the right. Track 1 (green) shows mappability –  
597 computed as in (35) – for all 76-mers in the MDV genome, which matches the read length of our  
598 RNA-sequencing experiment. Areas having mappability 1 correspond to unique regions, while areas  
599 having mappability 0.5 correspond to parts of the genome repeated twice. Track 2 (brown) shows  
600 the position of the open reading frames originally annotated by Tulman and colleagues (39-41) plus  
601 a few additional transcripts published more recently – gene nomenclature has been omitted to  
602 reduce clutter. Blue profile tracks (3 and 7) show the coverage of directional RNAseq along the  
603 forward strand in different biological conditions (infection with MDV strain RB-1B for track 3, and  
604 infection with MDV strain CVI-988 for track 7). Red tracks (5 and 9) show the corresponding  
605 coverage along the reverse strand of the virus. Tracks 4, 6, 8 and 10 show observed introns, as  
606 deduced from coverage in spliced reads. The intensity of a colour corresponds to its degree of  
607 coverage. Introns tracks are also directional (forward and reverse), and to each coverage track there  
608 corresponds an intron track (see labels). Placement of an intron in the inverted repeats (TRL vs IRL or  
609 IRS vs TRS) was done arbitrarily. There are several regions of the genome showing substantially  
610 different splicing patterns for the RB-1B and CVI-988 strains. Region A is magnified in Figure2; region  
611 B in Figure 3; region C in Figure 4. An interactive version of the browser can be found at  
612 <https://mallorn.pirbright.ac.uk/browsers/MDV-annotation/>.

613 This Figure can be reproduced in the browser by accessing the following URL:

614 [https://mallorn.pirbright.ac.uk/browsers/MDV-  
615 annotation/?loc=GaHV2\\_MD5%3A1..176031&tracks=Reference%2CMappability%20k%3D76%2CAnn  
616 otation%2CRB-1B%205%20days%20coverage%20forward%2CRB-  
617 1B%205%20days%20introns%2CRB-1B%205%20days%20coverage%20reverse%2CCVI-  
618 988%205%20days%20coverage%20forward%2CCVI-988%205%20days%20introns%2CCVI-  
619 988%205%20days%20coverage%20reverse&highlight=.](https://mallorn.pirbright.ac.uk/browsers/MDV-annotation/?loc=GaHV2_MD5%3A1..176031&tracks=Reference%2CMappability%20k%3D76%2CAnnotation%2CRB-1B%205%20days%20coverage%20forward%2CRB-1B%205%20days%20introns%2CRB-1B%205%20days%20coverage%20reverse%2CCVI-988%205%20days%20coverage%20forward%2CCVI-988%205%20days%20introns%2CCVI-988%205%20days%20coverage%20reverse&highlight=)

620

621

622 **Figure 2. The splicing landscape at the junction between terminal repeat long and unique long**  
623 **regions.** Alternative spliceforms across the 14KD polypeptide (pp14) gene of MDV in MDV strain RB-  
624 1B and MDV strain CVI-988 are compared. The top panel shows the whole MDV genome with the  
625 bottom panel showing a magnification of the region from 10 to 14kb (TRL/UL junction). From the  
626 RNA-sequencing signal one can see 4 main alternative spliceforms in CEFs infected by RB-1B,  
627 whereas 5 alternative spliceforms were identified in cells infected by CVI-988. As shown in track 8  
628 (Annotation) only 2 isoforms (14 kDA and 14kDB) are present in the standard MDV annotations as  
629 defined by Hong and Coussens (42).

630 The bottom panel of this Figure can be reproduced in the MDV genome browser by accessing the  
631 following URL:

632 [https://mallorn.pirbright.ac.uk/browsers/MDV-  
633 annotation/?loc=GaHV2\\_MD5%3A9554..14778&tracks=Reference%2CMappability%20k%3D76%2CA  
634 nnotation%2CRB-1B%205%20days%20coverage%20reverse%2CRB-  
635 1B%205%20days%20introns%2CCVI-988%205%20days%20coverage%20reverse%2CCVI-  
636 988%205%20days%20introns&highlight=.](https://mallorn.pirbright.ac.uk/browsers/MDV-annotation/?loc=GaHV2_MD5%3A9554..14778&tracks=Reference%2CMappability%20k%3D76%2CAnnotation%2CRB-1B%205%20days%20coverage%20reverse%2CRB-1B%205%20days%20introns%2CCVI-988%205%20days%20coverage%20reverse%2CCVI-988%205%20days%20introns&highlight=)

637

638

639 **Figure 3. The landscape of alternative splicing in the unique long region of MDV.** Splicing events on  
640 the forward strand of MDV (top panel). The region between positions 30 and 70kb is magnified in  
641 the bottom panel. Although many annotated and unannotated introns are present along this area in  
642 RB-1B during its infection of CEFs (track 9), the complexity of the splicing landscape in the same  
643 region is vastly superior in CVI-988, which shows several times more introns being actively spliced  
644 (track 11). Intron I3, which is one of the several expressed in CVI-988 and not in RB-1B, has been  
645 highlighted in the figure.

646 The bottom panel of this Figure can be reproduced in the MDV genome browser by accessing the  
647 following URL:

648 [https://mallorn.pirbright.ac.uk/browsers/MDV-  
649 annotation/?loc=GaHV2\\_MD5%3A31046..52165&tracks=Reference%2CMappability%20k%3D76%2C  
650 Annotation%2CRB-1B%205%20days%20coverage%20forward%2CRB-  
651 1B%205%20days%20introns%2CCVI-988%205%20days%20coverage%20forward%2CCVI-  
652 988%205%20days%20introns&highlight=.](https://mallorn.pirbright.ac.uk/browsers/MDV-annotation/?loc=GaHV2_MD5%3A31046..52165&tracks=Reference%2CMappability%20k%3D76%2CAnnotation%2CRB-1B%205%20days%20coverage%20forward%2CRB-1B%205%20days%20introns%2CCVI-988%205%20days%20coverage%20forward%2CCVI-988%205%20days%20introns&highlight=)

653

654

655 Figure 4. **Splicing events on the reverse strand of MDV** (top panel). The region between 106 and 114  
656 kbp is magnified in the bottom panel. In this region more splicing events were observed in MDV  
657 strain CVI-988 during its infection of CEFs compared to MDV strain RB-1B. In particular one of the  
658 unique introns (named I1 in Table 3), identified in MDV strain CVI-988 between the UL49.5 and UL49  
659 genes, was detected with a high read coverage (613 spliced reads), whereas in RB-1B the same  
660 isoform does not exist and a shorter intron can be observed. Intron I2 is also highlighted.

661 The bottom panel of this Figure can be reproduced in the MDV genome browser by accessing the  
662 following URL:

663 <https://mallorn.pirbright.ac.uk/browsers/MDV->

664 [annotation/?loc=GaHV2\\_MD5%3A104493..114979&tracks=Reference%2CMappability%20k%3D76%](https://mallorn.pirbright.ac.uk/browsers/MDV-annotation/?loc=GaHV2_MD5%3A104493..114979&tracks=Reference%2CMappability%20k%3D76%2CAnnotation%2CRB-1B%205%20days%20coverage%20reverse%2CRB-)

665 [2CAnnotation%2CRB-1B%205%20days%20coverage%20reverse%2CRB-](https://mallorn.pirbright.ac.uk/browsers/MDV-annotation/?loc=GaHV2_MD5%3A104493..114979&tracks=Reference%2CMappability%20k%3D76%2CAnnotation%2CRB-1B%205%20days%20coverage%20reverse%2CRB-)

666 [1B%205%20days%20coverage%20reverse%2CRB-](https://mallorn.pirbright.ac.uk/browsers/MDV-annotation/?loc=GaHV2_MD5%3A104493..114979&tracks=Reference%2CMappability%20k%3D76%2CAnnotation%2CRB-1B%205%20days%20coverage%20reverse%2CRB-)

667 [988%205%20days%20coverage%20reverse%2CCVI-](https://mallorn.pirbright.ac.uk/browsers/MDV-annotation/?loc=GaHV2_MD5%3A104493..114979&tracks=Reference%2CMappability%20k%3D76%2CAnnotation%2CRB-1B%205%20days%20coverage%20reverse%2CRB-)

668



669

670 **Figure 5. Tentative condition-dependent reannotation of splicing events on the reverse strand of**  
671 **MDV.** In-silico reconstructed coding spliced transcripts compatible with the introns observed from  
672 Illumina short sequencing read—the coding spliceforms shown in each panel have been produced by  
673 automatic prediction methods (see Materials and Methods) but the presence of full-length  
674 transcripts has not been experimentally validated. We show the likely presence of new spliceforms  
675 for genes UL49.5/UL49 (panel A), ICP4 (panel B), PP14 (panel C), and VP13/14/UL47 (panel D),  
676 respectively.

677 The panels of this Figure can be reproduced in the MDV genome browser by accessing the following  
678 URLs:

679 Panel A:

680 [https://mallorn.pirbright.ac.uk/browsers/MDV-  
681 annotation/?loc=GaHV2\\_MD5%3A110662..112751&tracks=Reference%2CMappability%20k%3D76%  
682 2CAnnotation%2CRB-1B%205%20days%20coverage%20reverse%2CRB-  
683 1B%205%20days%20introns%2CTentative%20reannotation%20RB-1B%2CCVI-  
684 988%205%20days%20coverage%20reverse%2CCVI-  
685 988%205%20days%20introns%2CTentative%20reannotation%20CVI-988&highlight=](https://mallorn.pirbright.ac.uk/browsers/MDV-annotation/?loc=GaHV2_MD5%3A110662..112751&tracks=Reference%2CMappability%20k%3D76%2CAnnotation%2CRB-1B%205%20days%20coverage%20reverse%2CRB-1B%205%20days%20introns%2CTentative%20reannotation%20RB-1B%2CCVI-988%205%20days%20coverage%20reverse%2CCVI-988%205%20days%20introns%2CTentative%20reannotation%20CVI-988&highlight=)

686 Panel B:

687 [https://mallorn.pirbright.ac.uk/browsers/MDV-  
688 annotation/?loc=GaHV2\\_MD5%3A142034..152411&tracks=Reference%2CMappability%20k%3D76%  
689 2CAnnotation%2CRB-1B%205%20days%20coverage%20reverse%2CRB-  
690 1B%205%20days%20introns%2CTentative%20reannotation%20RB-1B%2CCVI-  
691 988%205%20days%20coverage%20reverse%2CCVI-  
692 988%205%20days%20introns%2CTentative%20reannotation%20CVI-988&highlight=](https://mallorn.pirbright.ac.uk/browsers/MDV-annotation/?loc=GaHV2_MD5%3A142034..152411&tracks=Reference%2CMappability%20k%3D76%2CAnnotation%2CRB-1B%205%20days%20coverage%20reverse%2CRB-1B%205%20days%20introns%2CTentative%20reannotation%20RB-1B%2CCVI-988%205%20days%20coverage%20reverse%2CCVI-988%205%20days%20introns%2CTentative%20reannotation%20CVI-988&highlight=)

693 Panel C:

694 [https://mallorn.pirbright.ac.uk/browsers/MDV-  
695 annotation/?loc=GaHV2\\_MD5%3A9551..14739&tracks=Reference%2CMappability%20k%3D76%2CA  
696 nnotation%2CRB-1B%205%20days%20coverage%20reverse%2CRB-  
697 1B%205%20days%20introns%2CTentative%20reannotation%20RB-1B%2CCVI-  
698 988%205%20days%20coverage%20reverse%2CCVI-  
699 988%205%20days%20introns%2CTentative%20reannotation%20CVI-988&highlight=](https://mallorn.pirbright.ac.uk/browsers/MDV-annotation/?loc=GaHV2_MD5%3A9551..14739&tracks=Reference%2CMappability%20k%3D76%2CAnnotation%2CRB-1B%205%20days%20coverage%20reverse%2CRB-1B%205%20days%20introns%2CTentative%20reannotation%20RB-1B%2CCVI-988%205%20days%20coverage%20reverse%2CCVI-988%205%20days%20introns%2CTentative%20reannotation%20CVI-988&highlight=)

700 Panel D:

701 [https://mallorn.pirbright.ac.uk/browsers/MDV-  
702 annotation/?loc=GaHV2\\_MD5%3A105058..110282&tracks=Reference%2CMappability%20k%3D76%  
703 2CAnnotation%2CRB-1B%205%20days%20coverage%20reverse%2CRB-  
704 1B%205%20days%20introns%2CTentative%20reannotation%20RB-1B%2CCVI-  
705 988%205%20days%20coverage%20reverse%2CCVI-  
706 988%205%20days%20introns%2CTentative%20reannotation%20CVI-988&highlight=.](https://mallorn.pirbright.ac.uk/browsers/MDV-annotation/?loc=GaHV2_MD5%3A105058..110282&tracks=Reference%2CMappability%20k%3D76%2CAnnotation%2CRB-1B%205%20days%20coverage%20reverse%2CRB-1B%205%20days%20introns%2CTentative%20reannotation%20RB-1B%2CCVI-988%205%20days%20coverage%20reverse%2CCVI-988%205%20days%20introns%2CTentative%20reannotation%20CVI-988&highlight=)

707

708

709 **Figure 6. Panel A. Expression level of GAPDH and I1 at 5 days post infection in CEFs infected with**  
710 **1000, 100 or 10 PFU of MDV strain CVI-988 or RB-1B.** Three independent biological replicated were  
711 measured per PFU value. Note that the x scale is not continuous – there are only three, discrete,  
712 values corresponding to 1000, 100 and 10 PFU. Small horizontal deviations from such values have  
713 been introduced only to make the plot more readable. **Panel B. Expression of I1 in CEFs transfected**  
714 **with RB-1B or CVI-988 BAC DNA as a function of time.** Cells were harvested at time points 6, 12, 18,  
715 30, 42, 54, 66, 78, and 90 hours post transfection. Expression levels of I1 were calculated and  
716 normalised to the corresponding levels for GAPDH (see Materials and Methods), and the ratios  
717 displayed on the graph for each time point. Three independent biological replicates were measured  
718 per time point. P-values are 0.37, 0.29, 0.50, 0.81, 0.88, 0.41, 0.008, 0.06, and 0.00067. P-values  
719 were computed with a multiple t-test.

720

721 **Figure 7. Differential expression in CEFs of introns I1-I3 in CVI-988 and RB-1B.** Expression levels of  
722 introns I1, I2, and I3 were detected in CEFs infected with 500 PFU of MDV strains CVI-988 or RB-1B at  
723 5 days post infection, and the ratio of the expressions in CVI-988 and RB-1B was computed for each  
724 intron (see labels on the x axis). Expression levels in RB-1B and CVI-988 were normalised against the  
725 expression level of GAPDH. Six independent biological replicates were performed.

726 Tables

727

728 Table 1. Alignment statistics for our dataset (reads have been produced using a directional  
729 sequencing protocol). To each read one or more alignments can correspond (for instance, a read  
730 might align to both terminal repeats).

| MDV strain          | Reads mapping to the forward viral strand | Alignments to the forward viral strand | Reads mapping to the reverse viral strand | Alignments to the reverse viral strand |
|---------------------|-------------------------------------------|----------------------------------------|-------------------------------------------|----------------------------------------|
| CVI-988 replicate 1 | 949,845                                   | 1,273,630                              | 639,578                                   | 966,599                                |
| CVI-988 replicate 2 | 1,391,374                                 | 1,865,743                              | 932,231                                   | 1,404,683                              |
| RB-1B replicate 1   | 717,633                                   | 1,213,552                              | 549,656                                   | 998,707                                |
| RB-1B replicate 2   | 650,431                                   | 1,110,938                              | 496,594                                   | 914,609                                |

731

732

733

734 Table 2. Enumeration of putative novel coding splicing isoforms for several MDV genes, as deduced  
 735 from introns observed in CEF cells infected by MDV strains RB-1B and CVI-988.

| Genomic region | Spliceforms In CVI-988 | Spliceforms In RB-1B | Function                                        |
|----------------|------------------------|----------------------|-------------------------------------------------|
| vIL8           | 5                      | 5                    | Viral IL8                                       |
| pp14A/B        | 6                      | 5                    | 14KD lytic proteins                             |
| Lip            | 3                      | 2                    | Lipase                                          |
| UL3            | 5                      | 3                    | Nuclear phosphoprotein                          |
| UL15           | 17                     | 4                    | DNA packaging protein                           |
| UL19           | 4                      | 4                    | Major capsid protein                            |
| UL21           | 3                      | 2                    | Membrane protein                                |
| UL24           | 2                      | 2                    | Reactivating from latency/immune evasion        |
| UL28           | 7                      | 1                    | DNA packaging protein.                          |
| UL29           | 2                      | 1                    | DNA binding protein                             |
| UL34           | 2                      | 1                    | Membrane phosphoprotein                         |
| UL38           | 2                      | 1                    | Capsid protein                                  |
| UL41           | 4                      | 1                    | Tegument protein                                |
| UL44           | 6                      | 5                    | Glycoprotein C                                  |
| VP11/12        | 2                      | 1                    | Tegument phosphoprotein                         |
| VP13/14        | 11                     | 1                    | Tegument phosphoprotein                         |
| VP16           | 3                      | 3                    | Tegument immediate early protein                |
| VP22           | 2                      | 2                    | Tegument phosphoprotein                         |
| UL52/UL53/UL54 | 14                     | 4                    | DNA helicase/glycoprotein K/ICP27 like proteins |
| RLORF14a       | 3                      | 3                    | 38 KD protein                                   |
| ICP4           | 5                      | 1                    | IE protein                                      |
| ICP4 area      | 15                     | 7                    |                                                 |
| US7            | 5                      | 3                    | Glycoprotein I                                  |
| US8            | 3                      | 3                    | Glycoprotein E                                  |

736

737



738 Table 3. List of introns that are (A) spliced exclusively in MDV strain CVI-988, (B) spliced exclusively in  
 739 MDV strain RB-1B. To make splicing events occurring in different MDV strains comparable, all introns  
 740 are listed in terms of coordinates based on the genomic sequence of MDV reference strain MD5  
 741 (NCBI accession NC\_002229.3). Mapping the introns occurring in the RB-1B/CVI-988 transcriptomes  
 742 to the MD5 genome was possible thanks to the extremely high sequence similarity (>99%) shared by  
 743 MD5, RB-1B and CVI-988. A full table with intron coordinates with respect to all the three strains is  
 744 provided as Supplementary Table 2.

| MDV strain                                           | Strand | Position of first intron nucleotide | Position of last intron nucleotide | Gene                         | Read coverage | Name |
|------------------------------------------------------|--------|-------------------------------------|------------------------------------|------------------------------|---------------|------|
| <b>A. Introns only spliced in MDV strain CVI-988</b> |        |                                     |                                    |                              |               |      |
| GaHV2                                                | -      | 112359                              | 111959                             | VP22 gene, intergenic region | 646           | I1   |
| GaHV2                                                | -      | 112881                              | 112500                             | UL50                         | 58            | I2   |
| GaHV2                                                | +      | 43021                               | 43723                              | UL15, terminase              | 39            | I3   |
| GaHV2                                                | +      | 43021                               | 43166                              | UL15, terminase              | 42            |      |
| GaHV2                                                | +      | 50934                               | 51306                              | UL21                         | 38            |      |
| GaHV2                                                | -      | 108334                              | 107252                             | UL46 / UL47                  | 29            |      |
| GaHV2                                                | +      | 43021                               | 43808                              | UL15, terminase              | 28            |      |
| <b>B. Introns only spliced in MDV strain RB-1B</b>   |        |                                     |                                    |                              |               |      |
| GaHV2                                                | -      | 111959                              | 112277                             | UL49 / UL49.5                | 19            |      |

745

(1) Mappability k=76

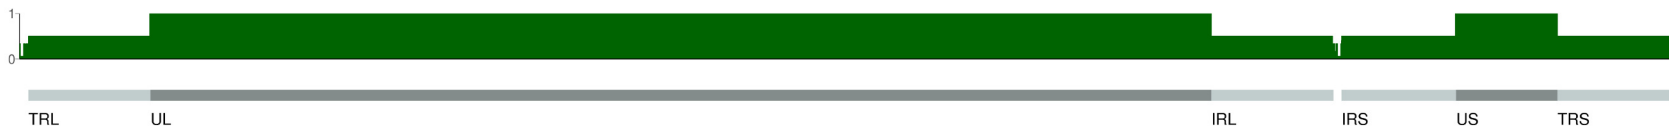

(2) Annotation

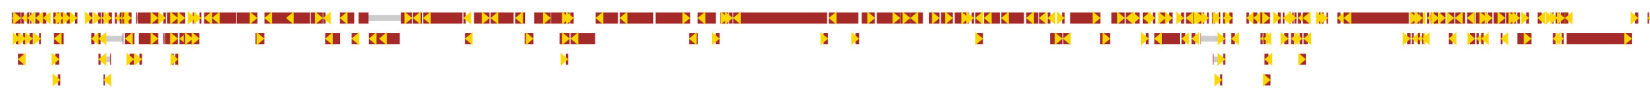

(3) RB-1B 5 days coverage forward

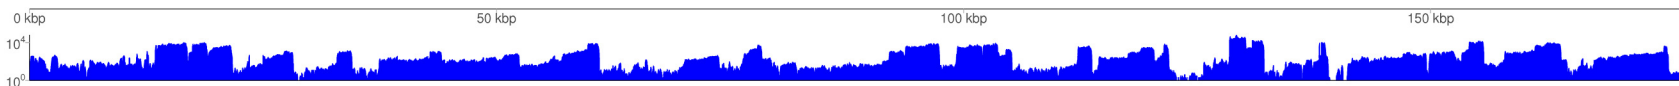

(4) RB-1B 5 days introns forward

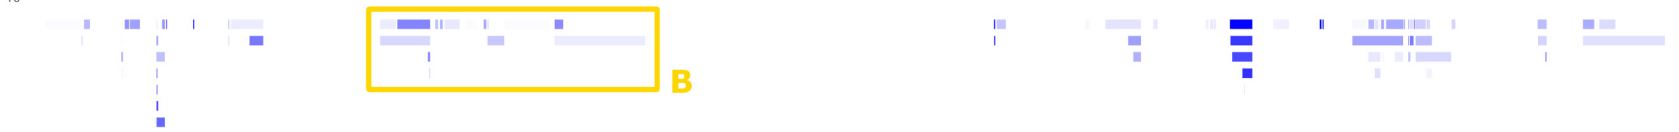

(5) RB-1B 5 days coverage reverse

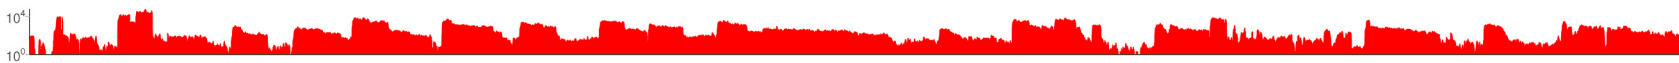

(6) RB-1B 5 days introns reverse

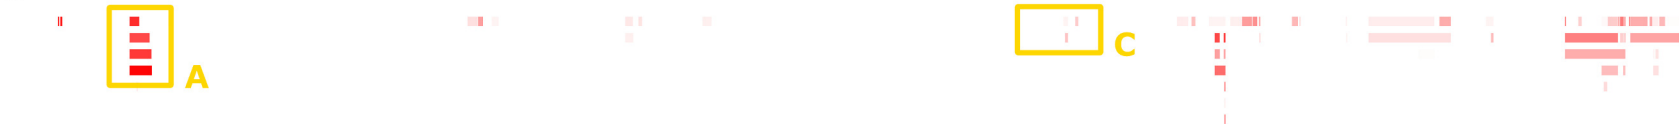

(7) CVI-988 5 days coverage forward

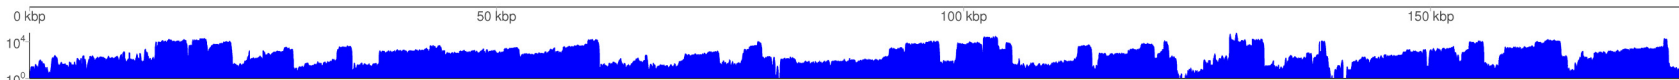

(8) CVI-988 5 days introns forward

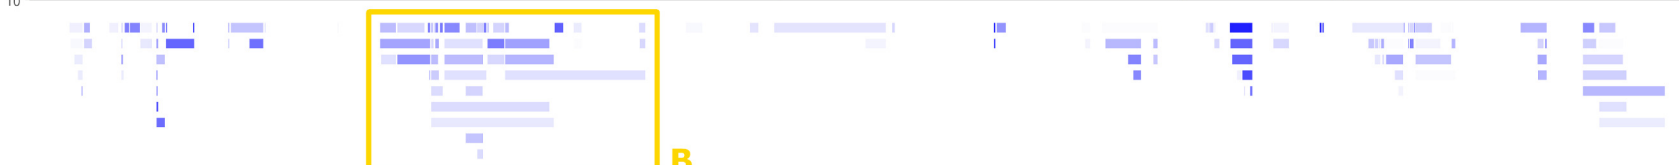

(9) CVI-988 5 days coverage reverse

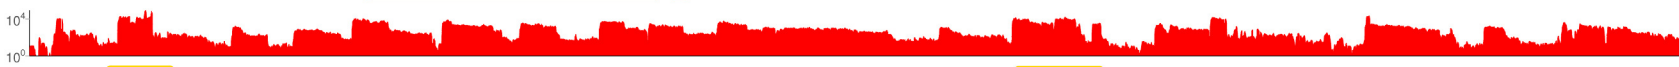

(10) CVI-988 5 days introns reverse

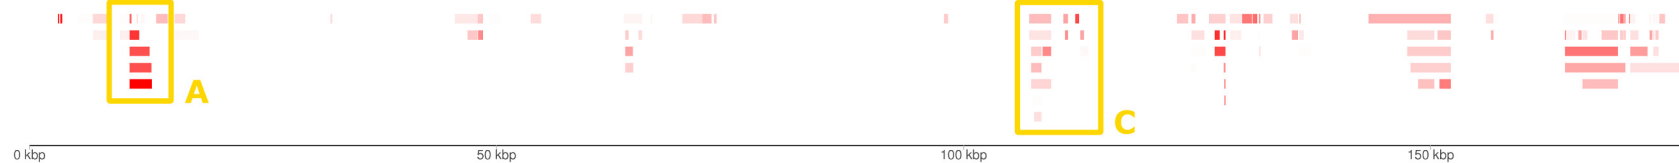

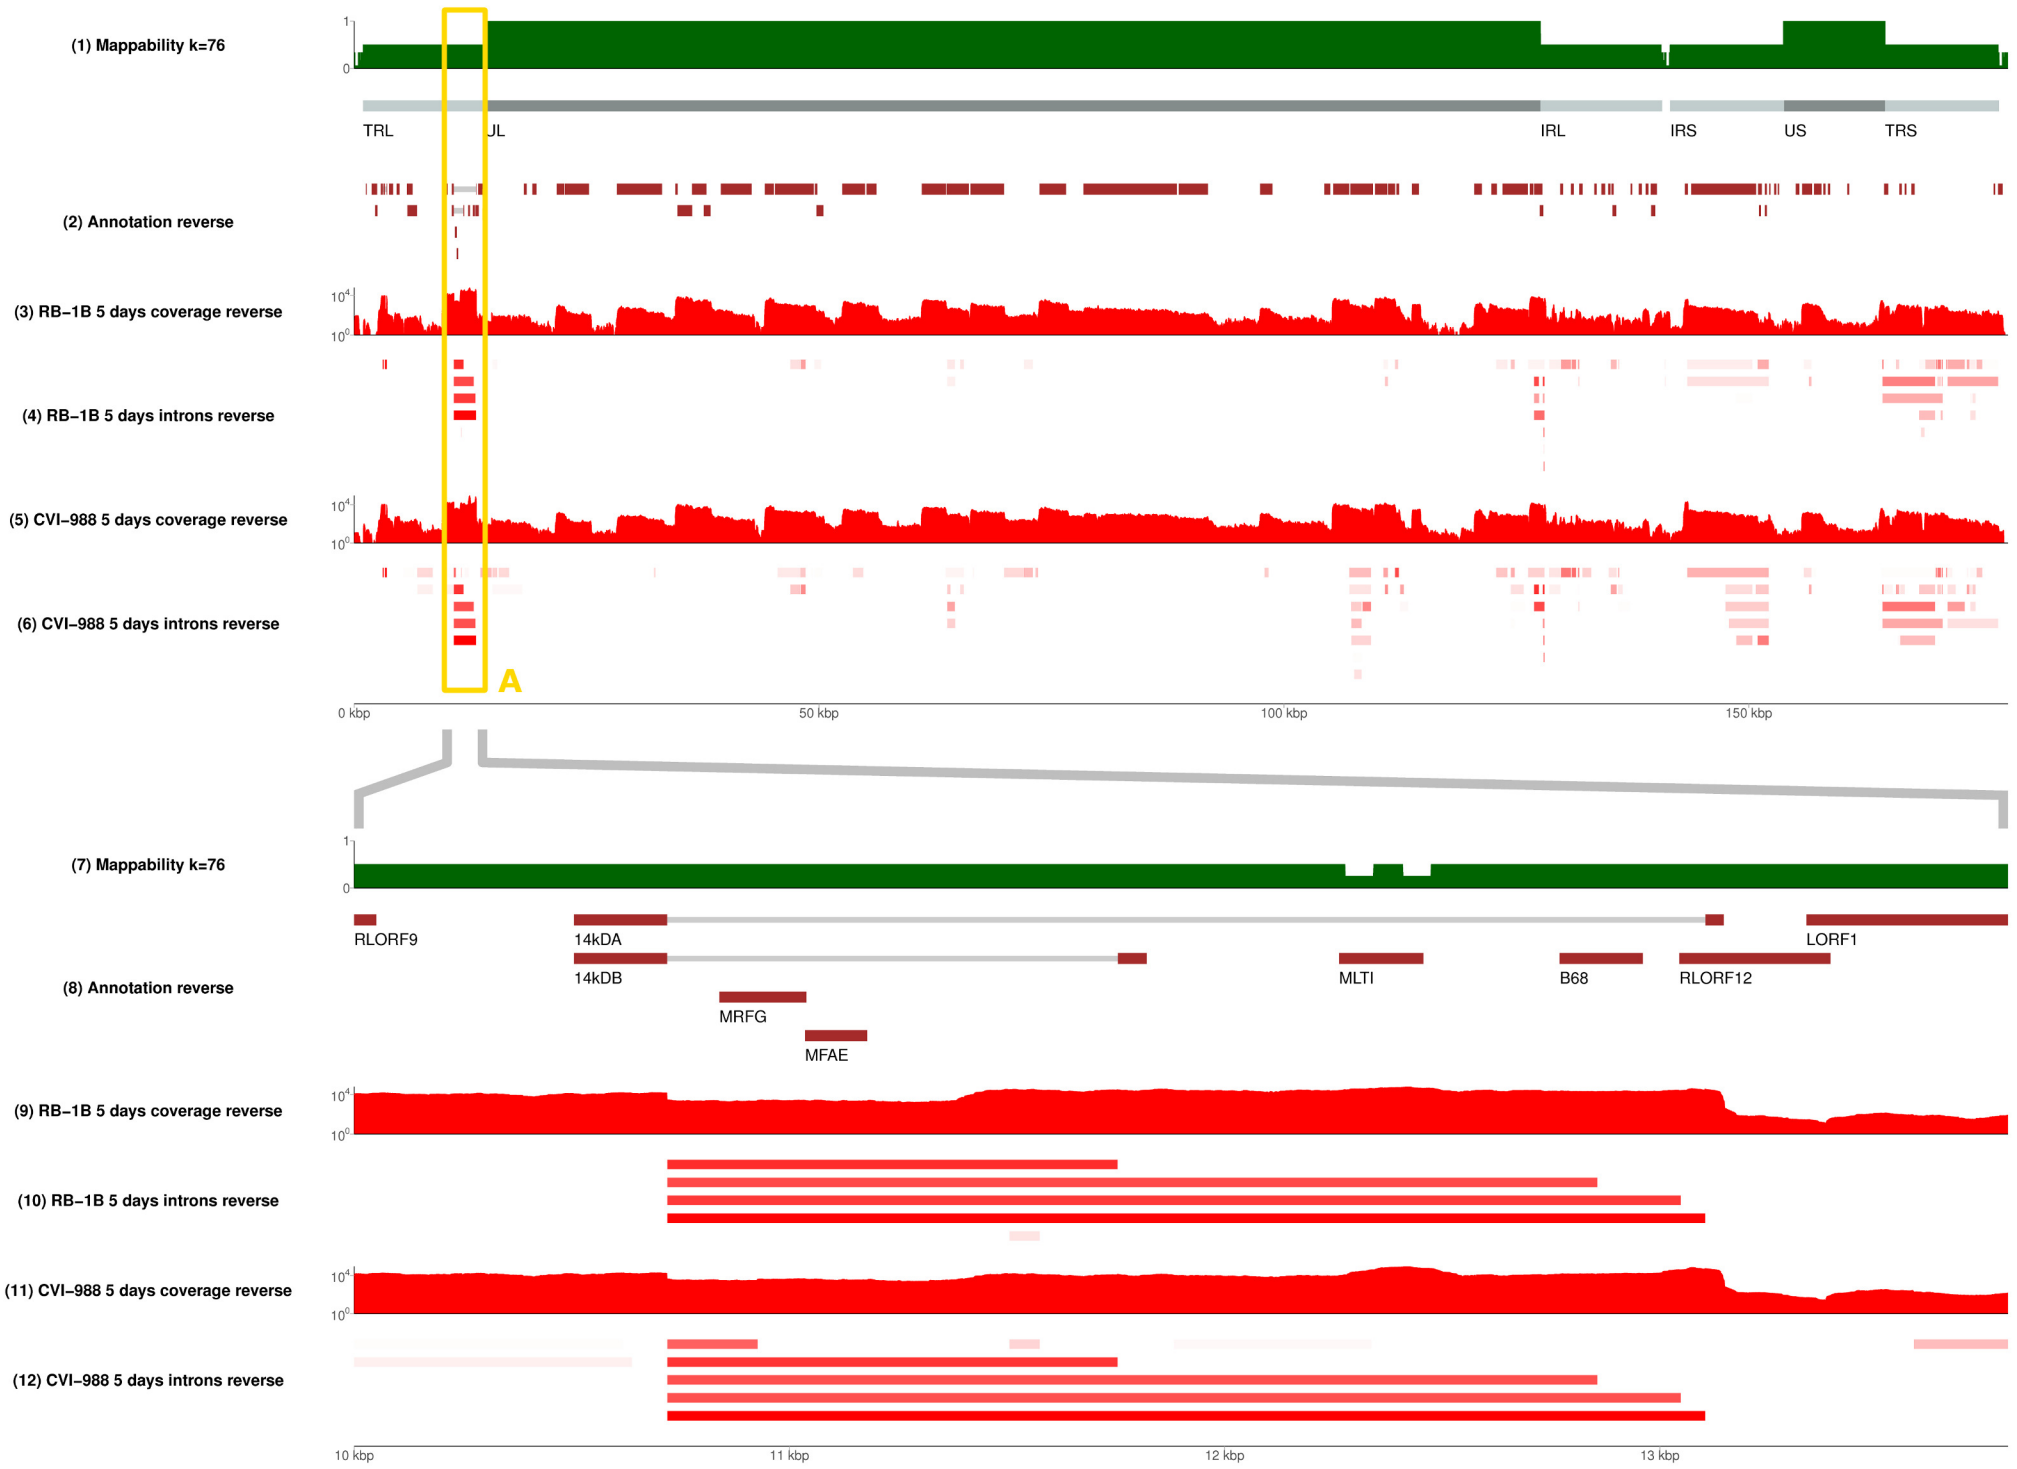

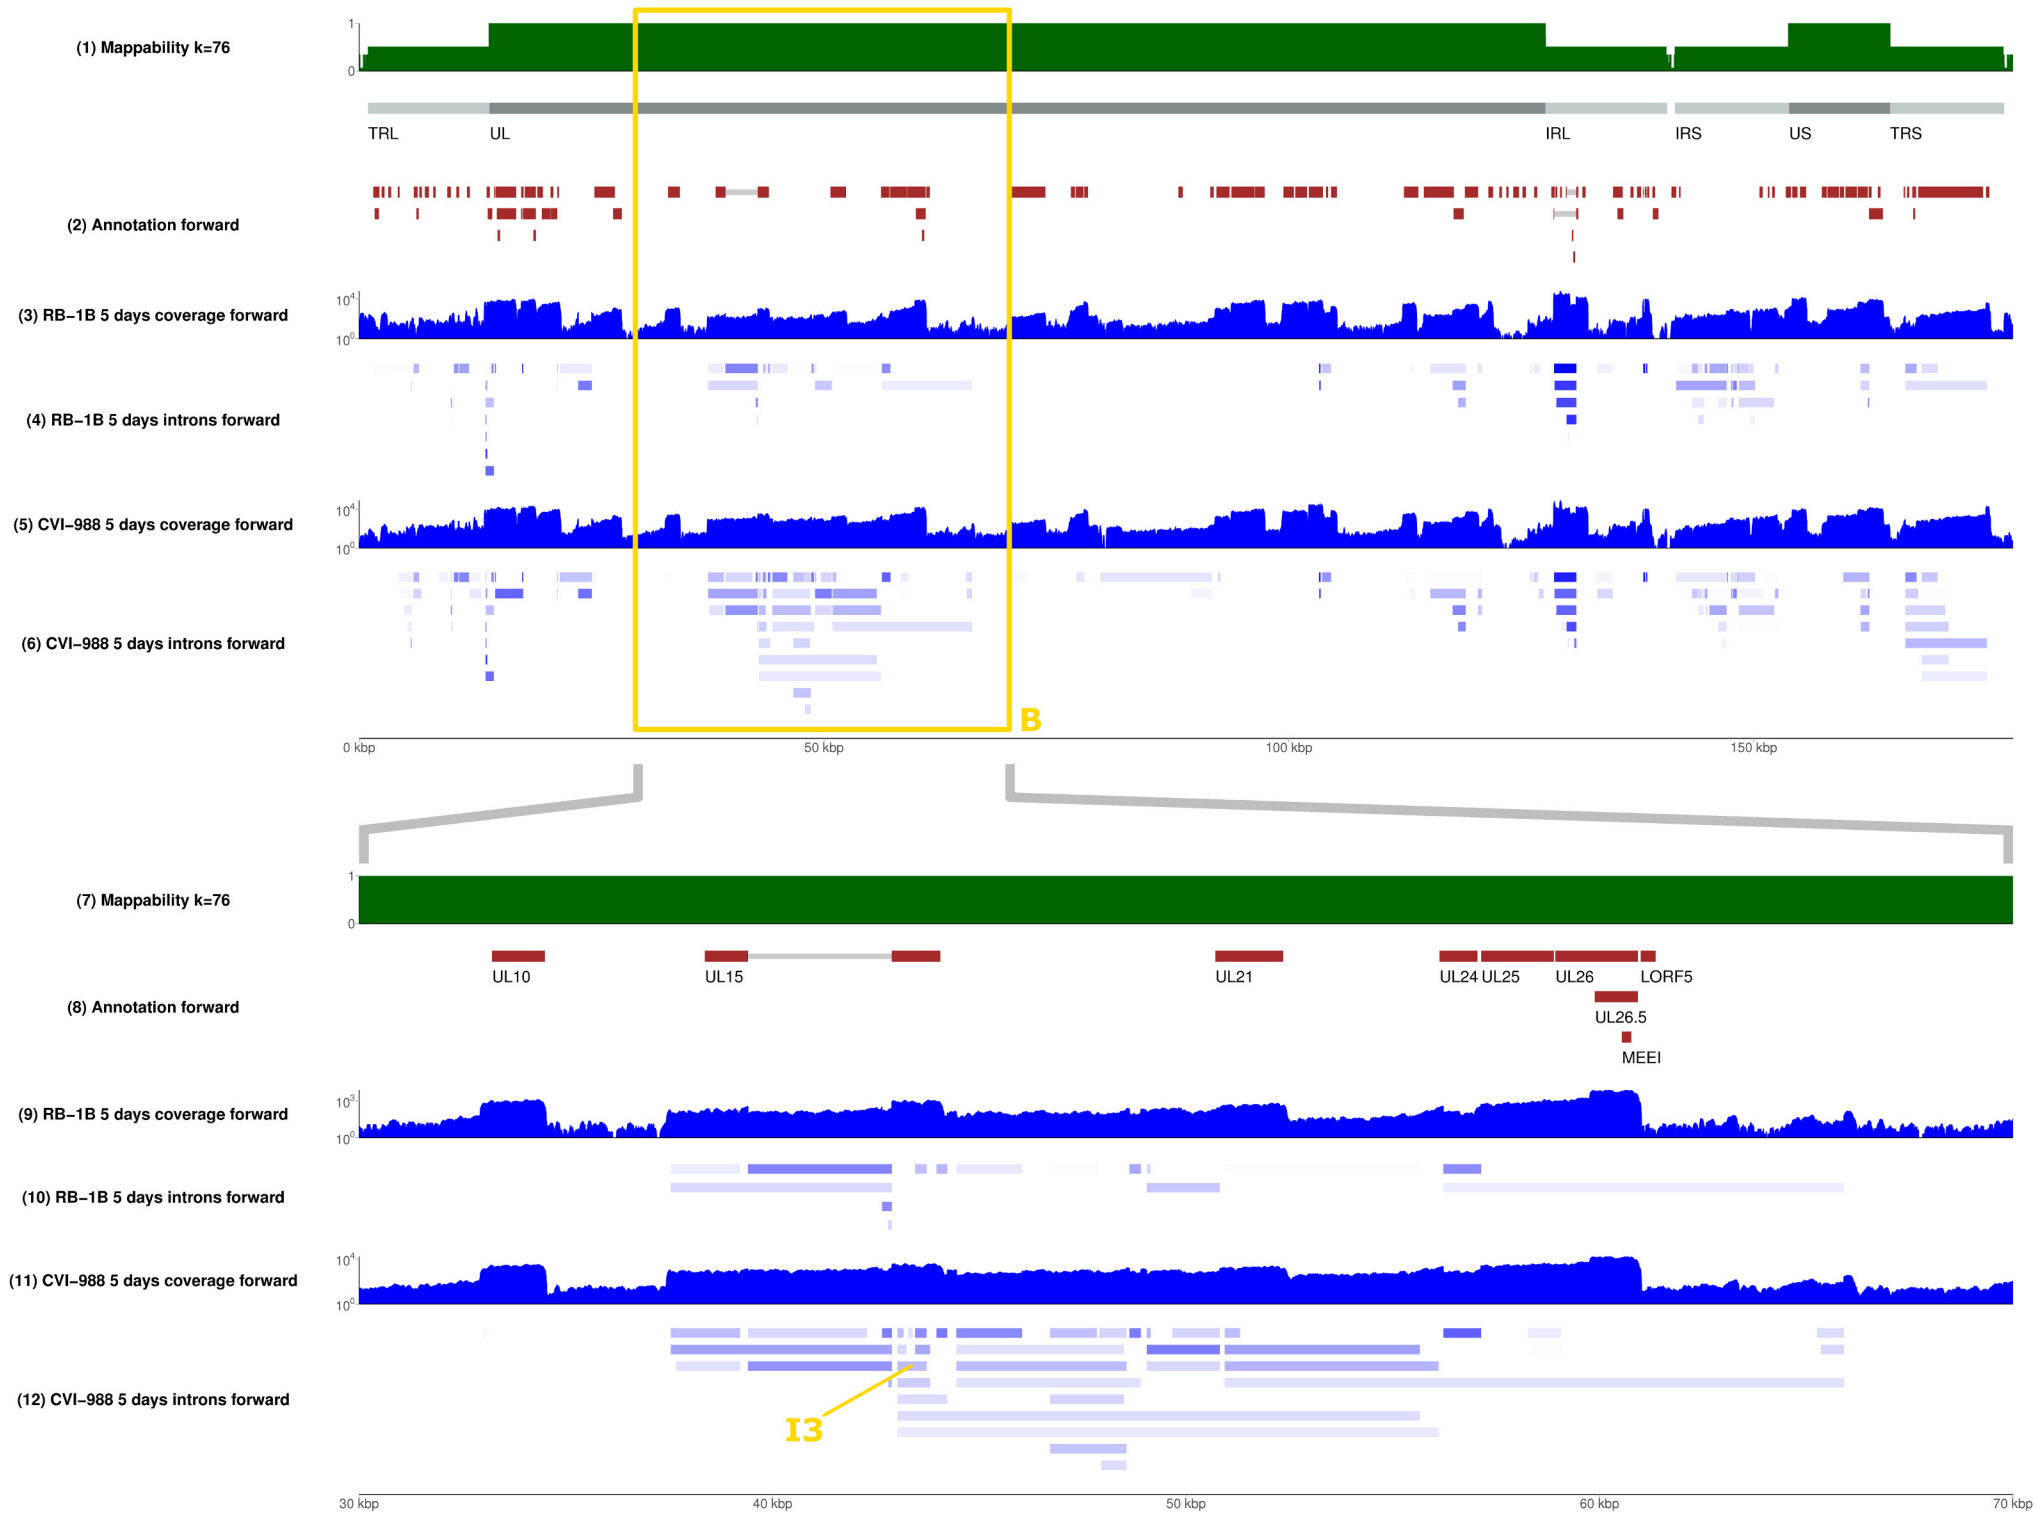

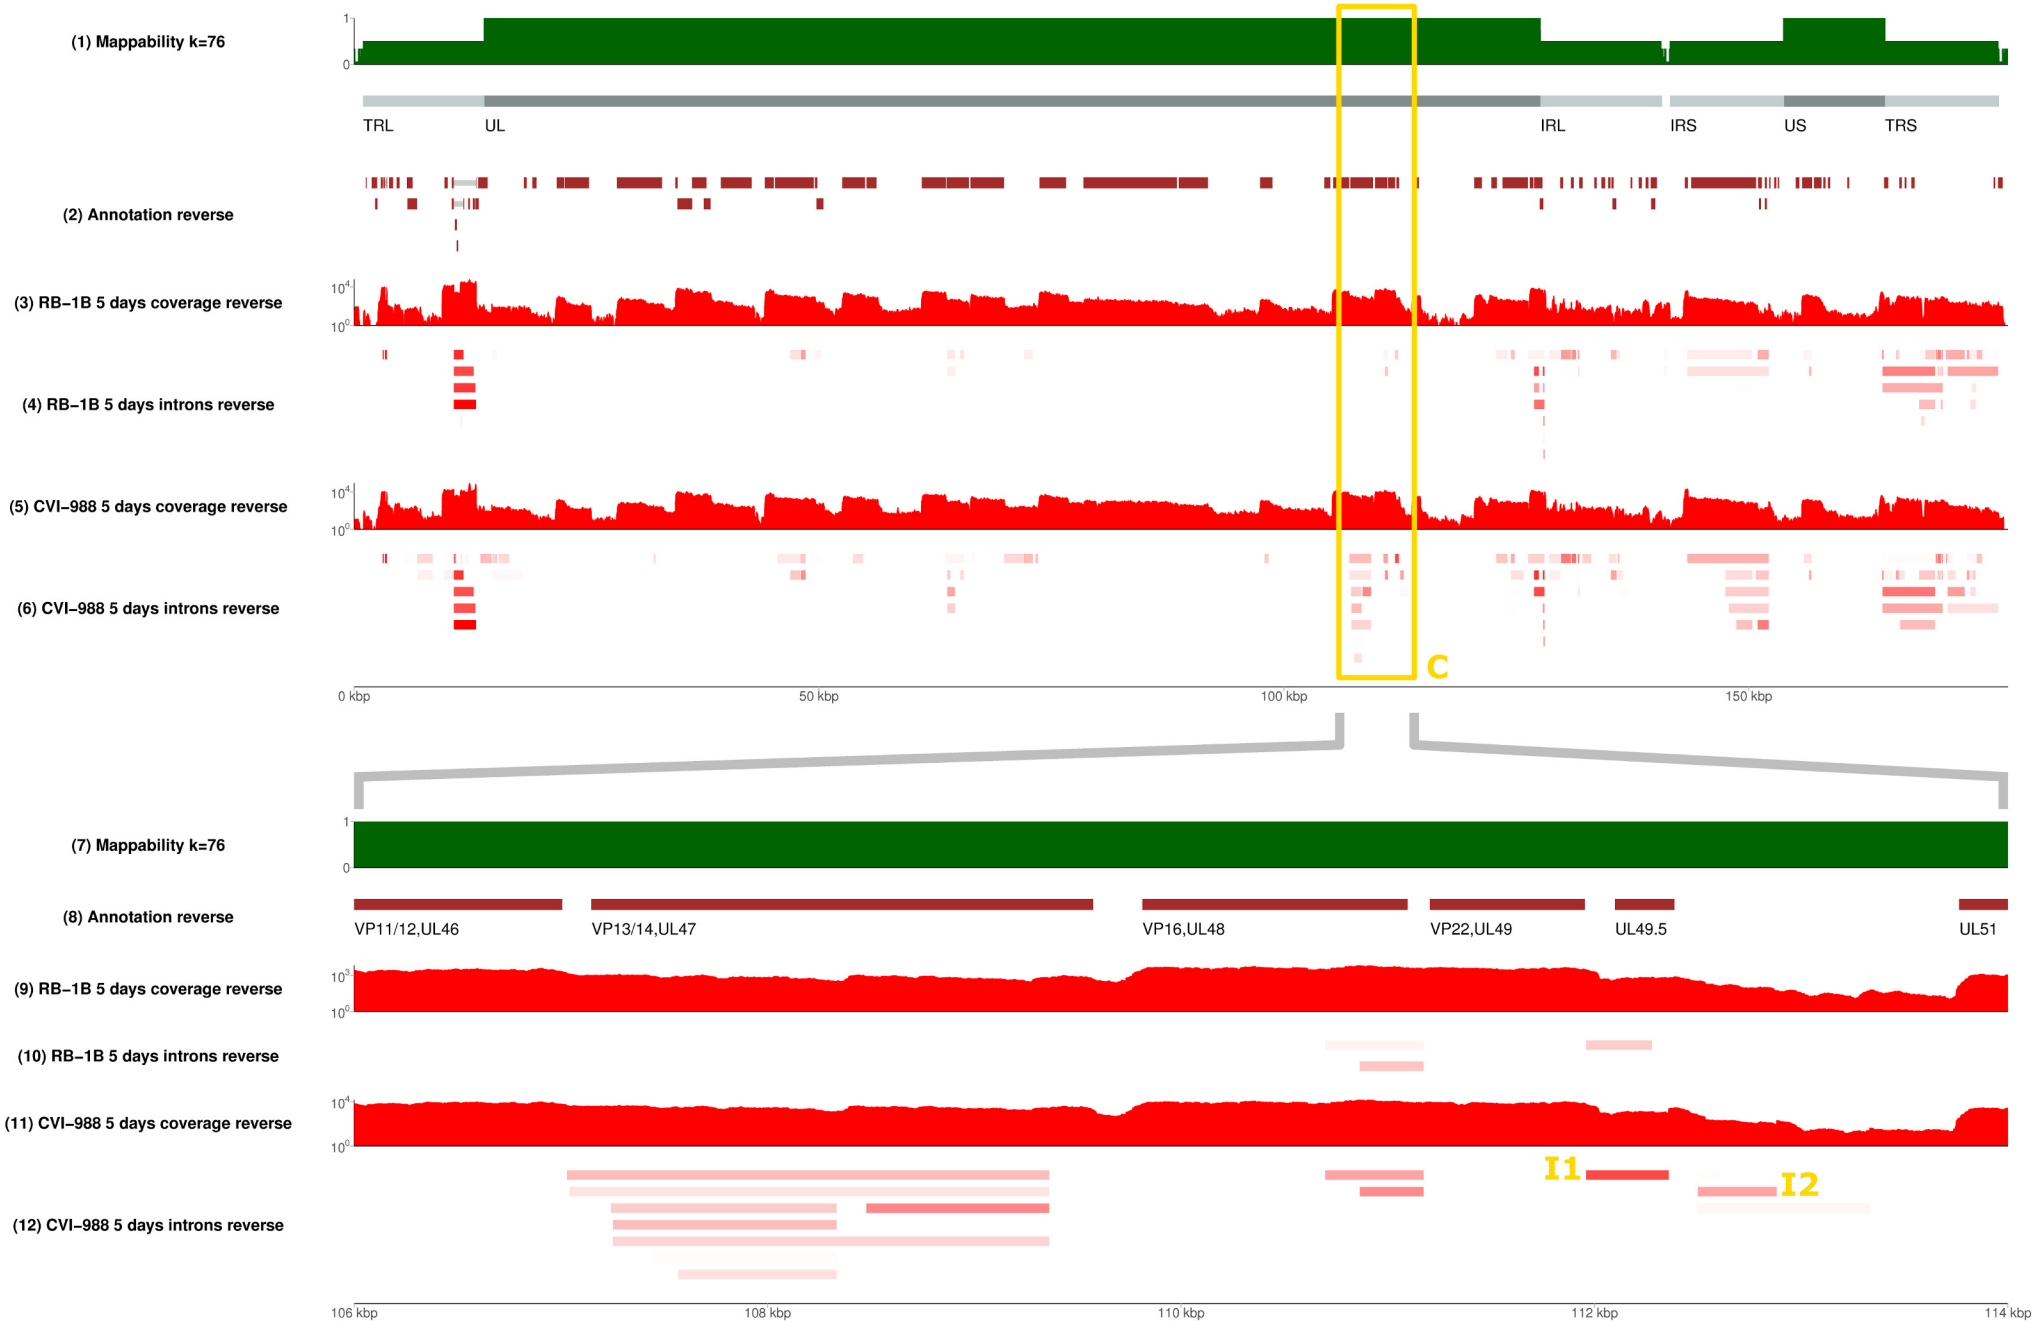

**A**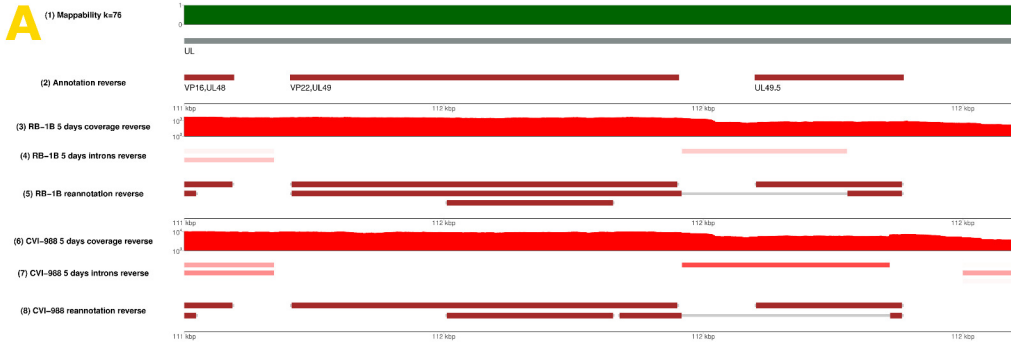**B**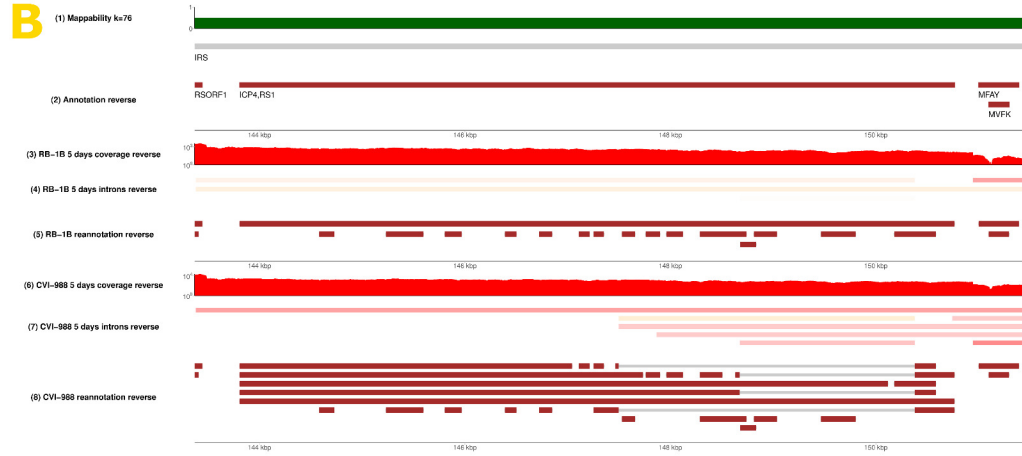**C**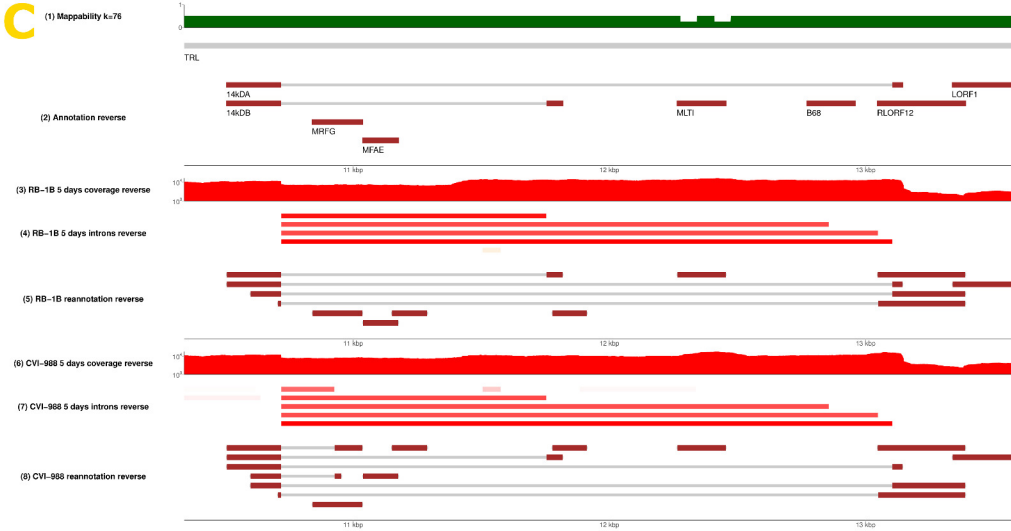**D**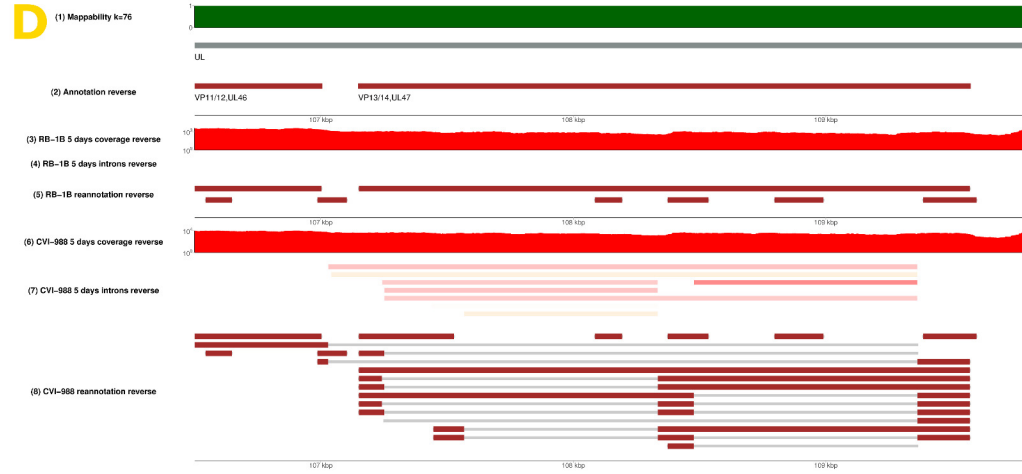

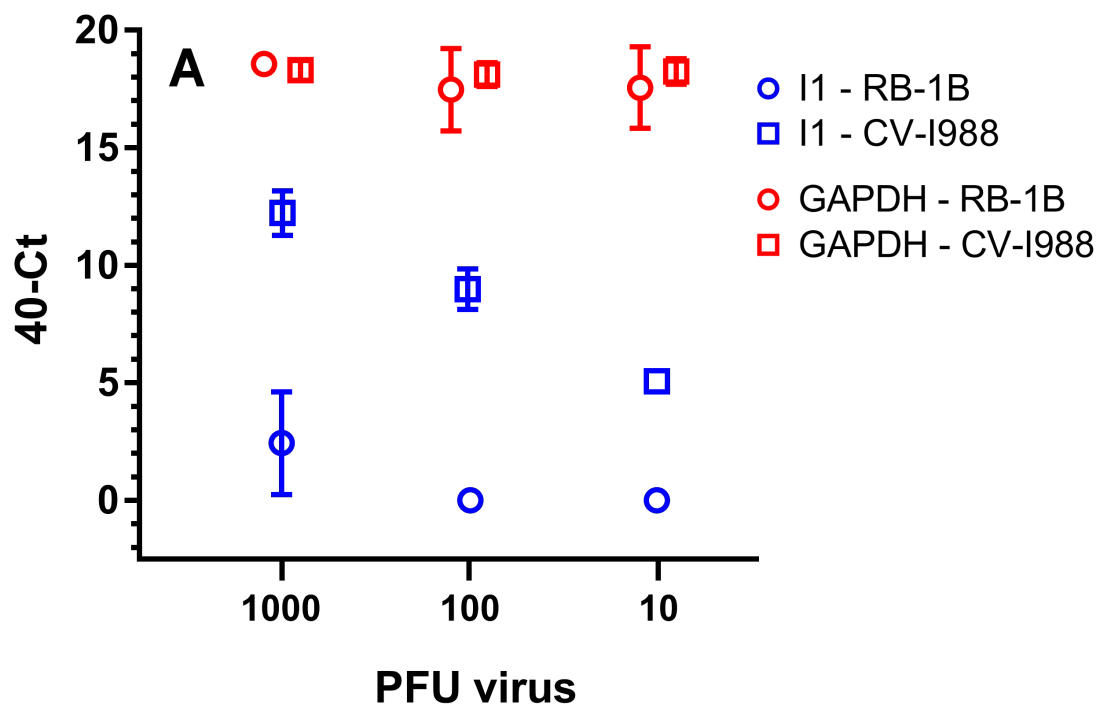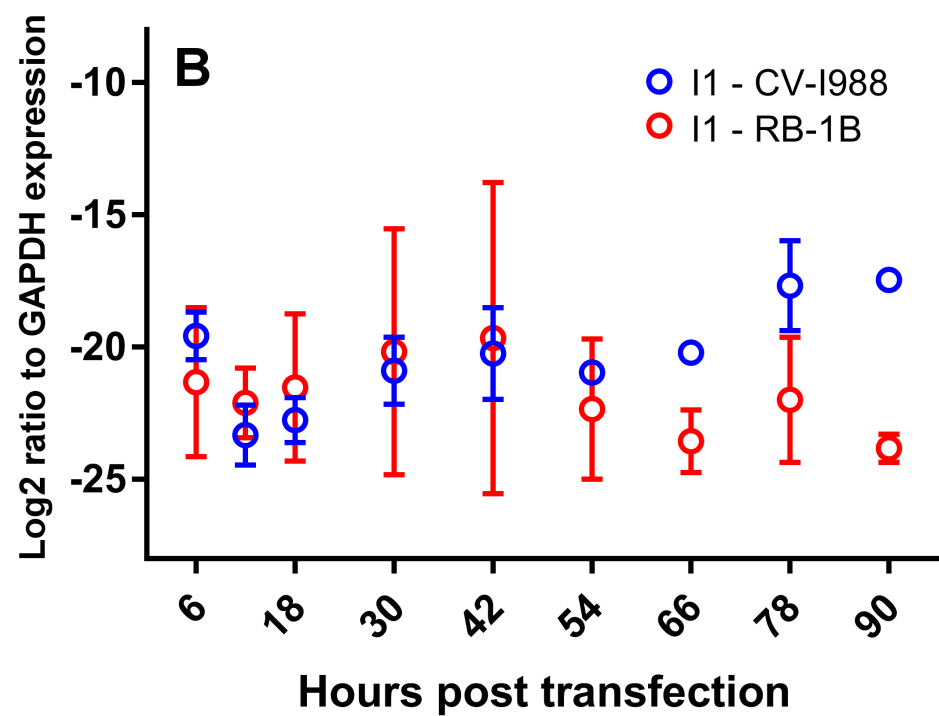



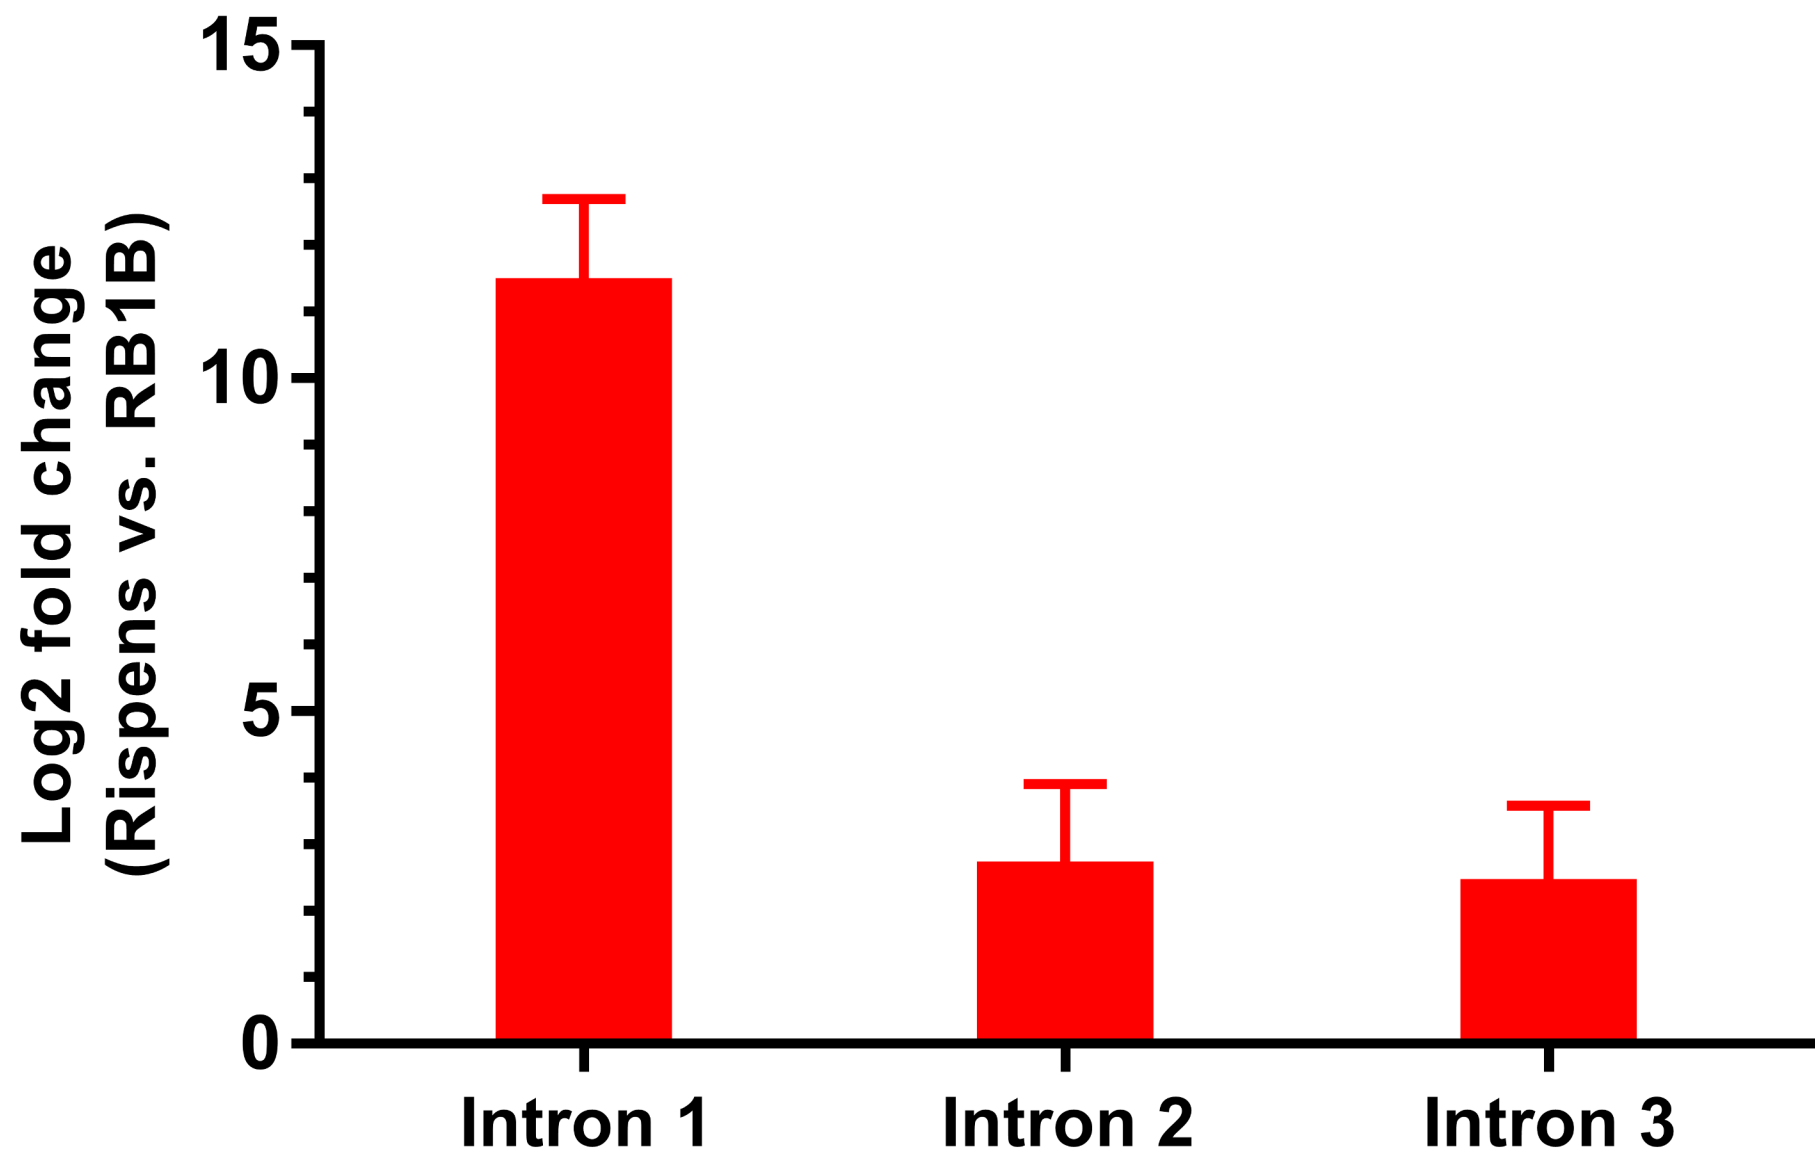

Source: https://www.biorxiv.org/content/biorxiv/early/2019/08/02/723114.full.pdf
